# Supplementary material for: Comparative transcriptome analyses reveal genes related to pigmentation in the petals of a flower color variation cultivar of Rhododendron obtusum
Source: Research Square preprint supplement (doi:10.21203/rs.3.rs-263287/v1), 2021-03-03
Supplement: Supplementary file 2 [file 4847ec7db6e7354d7e774c0c.xlsx]

## Sheet: Sheet1
#id	log2(Y-S2/D-S2)	pvalue	regulated	KOG_class_annotation	Pfam_annotation	Swissprot_annotation	nr_annotation
TRINITY_DN62378_c2_g1	-2.27097	8.35e-19	down	Posttranslational modification, protein turnover, chaperones	Myb-like DNA-binding domain	Protein CCA1 OS=Arabidopsis thaliana OX=3702 GN=CCA1 PE=1 SV=1	lhy1, partial [Populus tremula]
TRINITY_DN51472_c0_g2	-1.78611	0.0043436	down	Transcription	--	Myb-related protein 306 OS=Antirrhinum majus OX=4151 GN=MYB306 PE=2 SV=1	PREDICTED: LOW QUALITY PROTEIN: myb-related protein 306 [Oryza sativa Japonica Group]
TRINITY_DN63601_c3_g1	-1.67974	1.95e-06	down	Posttranslational modification, protein turnover, chaperones	Myb-like DNA-binding domain	Protein REVEILLE 4 OS=Arabidopsis thaliana OX=3702 GN=RVE4 PE=1 SV=1	Homeodomain-like protein [Cynara cardunculus var. scolymus]
TRINITY_DN52302_c2_g1	-1.23208	8.27e-13	down	Transcription	--	Myb-related protein 340 OS=Antirrhinum majus OX=4151 GN=MYB340 PE=2 SV=1	--
TRINITY_DN59028_c0_g2	-1.20848	8.65e-08	down	Posttranslational modification, protein turnover, chaperones	Myb-like DNA-binding domain	Protein REVEILLE 1 OS=Arabidopsis thaliana OX=3702 GN=RVE1 PE=2 SV=1	Protein REVEILLE like [Actinidia chinensis var. chinensis]
TRINITY_DN47821_c0_g1	-1.09891	8.04e-09	down	Transcription	Myb-like DNA-binding domain;; Myb-like DNA-binding domain	Transcription factor MYB101 OS=Arabidopsis thaliana OX=3702 GN=MYB101 PE=2 SV=1	Transcription factor GAMYB like [Actinidia chinensis var. chinensis]
TRINITY_DN51453_c1_g2	-1.05519	0.000182657	down	Transcription	Myb-like DNA-binding domain;; Myb-like DNA-binding domain	Transcription factor MYB78 OS=Arabidopsis thaliana OX=3702 GN=MYB78 PE=2 SV=1	transcription factor MYB108 [Prunus avium]
TRINITY_DN67187_c1_g5	-1.0404	8.48e-09	down	Transcription	Myb-like DNA-binding domain;; Myb-like DNA-binding domain	Myb-related protein 305 OS=Antirrhinum majus OX=4151 GN=MYB305 PE=2 SV=1	MYB-related transcription factor [Salvia miltiorrhiza]
TRINITY_DN49281_c1_g6	-1.021	3.91e-19	down	Transcription	--	Myb-related protein 305 OS=Antirrhinum majus OX=4151 GN=MYB305 PE=2 SV=1	Myb-related protein [Actinidia chinensis var. chinensis]
TRINITY_DN58809_c0_g4	-1.00213	1.5e-06	down	Posttranslational modification, protein turnover, chaperones	Myb-like DNA-binding domain;; Myb-like DNA-binding domain	Transcription factor DIVARICATA OS=Antirrhinum majus OX=4151 GN=DIVARICATA PE=2 SV=1	Transcription factor DIVARICATA like [Actinidia chinensis var. chinensis]
TRINITY_DN64867_c0_g1	-1.04687	0.000543935	down	Transcription	Transcription factor MYB113 OS=Arabidopsis thaliana OX=3702 GN=MYB113 PE=1 SV=1	transcription factor MYB1, partial [Vaccinium corymbosum]
TRINITY_DN59015_c3_g2	-2.62812	8.38856e-10	down	Transcription	Transcription factor MYB108 OS=Arabidopsis thaliana OX=3702 GN=MYB108 PE=1 SV=1	hypothetical protein POPTR_010G149900v3 [Populus trichocarpa]
TRINITY_DN55156_c1_g2	10.5238	0.00013506	up	--	--	MYB-like transcription factor ETC1 OS=Arabidopsis thaliana OX=3702 GN=ETC1 PE=2 SV=1	MYB-like transcription factor ETC1 [Rosa chinensis]
TRINITY_DN53621_c6_g1	2.47547	0.00345449	up	Transcription	Myb-like DNA-binding domain;; Myb-like DNA-binding domain	Transcription factor RAX3 OS=Arabidopsis thaliana OX=3702 GN=RAX3 PE=2 SV=1	Transcription factor like [Actinidia chinensis var. chinensis]
TRINITY_DN62502_c1_g3	2.01654	0.000305194	up	Transcription	Myb-like DNA-binding domain;; Myb-like DNA-binding domain	Transcription factor MYB82 OS=Arabidopsis thaliana OX=3702 GN=MYB82 PE=1 SV=1	Transcription factor like [Actinidia chinensis var. chinensis]
TRINITY_DN55019_c0_g2	1.92087	5.34754e-05	up	--	Myb-like DNA-binding domain	Putative Myb family transcription factor At1g14600 OS=Arabidopsis thaliana OX=3702 GN=At1g14600 PE=2 SV=2	hypothetical protein VITISV_025194 [Vitis vinifera]
TRINITY_DN48576_c0_g2	1.91857	1.19e-08	up	Transcription	Myb-like DNA-binding domain;; Myb-like DNA-binding domain	Transcription repressor MYB5 OS=Arabidopsis thaliana OX=3702 GN=MYB5 PE=1 SV=1	transcription factor MYB9, partial [Vaccinium corymbosum]
TRINITY_DN64568_c0_g1	1.85769	1.12e-07	up	Transcription	Myb-like DNA-binding domain;; Myb-like DNA-binding domain	Transcription factor AS1 OS=Arabidopsis thaliana OX=3702 GN=AS1 PE=1 SV=1	PREDICTED: transcription factor AS1 [Vitis vinifera]
TRINITY_DN48267_c5_g1	1.46432	1.08e-08	up	Transcription	Myb-like DNA-binding domain;; Myb-like DNA-binding domain	Transcription factor MYB106 OS=Arabidopsis thaliana OX=3702 GN=MYB106 PE=2 SV=1	Transcription factor like [Actinidia chinensis var. chinensis]
TRINITY_DN59175_c2_g1	1.44638	6.06e-06	up	Transcription	Myb-like DNA-binding domain;; Myb-like DNA-binding domain	Transcription repressor MYB6 OS=Arabidopsis thaliana OX=3702 GN=MYB6 PE=1 SV=1	putative MYB transcription factor [Diospyros kaki]
TRINITY_DN56421_c2_g1	1.26443	4.96e-08	up	Transcription	Myb-like DNA-binding domain;; Myb-like DNA-binding domain	Transcription factor CSA OS=Oryza sativa subsp. japonica OX=39947 GN=CSA PE=2 SV=2	PREDICTED: myb-related protein B-like [Juglans regia]
TRINITY_DN58936_c3_g1	1.2599	0.000346352	up	Transcription	Myb-like DNA-binding domain;; Myb-like DNA-binding domain	Anthocyanin regulatory C1 protein OS=Zea mays OX=4577 GN=C1 PE=2 SV=1	PREDICTED: myb-related protein 308 [Theobroma cacao]
TRINITY_DN62118_c0_g1	1.13831	1.84e-06	up	Transcription	--	Transcription factor WER OS=Arabidopsis thaliana OX=3702 GN=WER PE=1 SV=1	Transcription factor WER like [Actinidia chinensis var. chinensis]
TRINITY_DN49554_c0_g1	1.05893	0.000514925	up	Transcription	--	Transcription factor TT2 OS=Arabidopsis thaliana OX=3702 GN=TT2 PE=1 SV=1	transcription factor MYB5e [Camellia sinensis]
TRINITY_DN57141_c1_g1	1.00936	9.726e-08	up	--	Myb-like DNA-binding domain	Transcription factor LUX OS=Arabidopsis thaliana OX=3702 GN=LUX PE=1 SV=1	Transcription factor LUX like [Actinidia chinensis var. chinensis]
TRINITY_DN50379_c2_g3	1.16492	4.11e-07	up	Transcription	Myb-like DNA-binding domain;; Myb-like DNA-binding domain	Transcription factor MYB61 OS=Arabidopsis thaliana OX=3702 GN=MYB61 PE=2 SV=1	Transcription factor like [Actinidia chinensis var. chinensis]
TRINITY_DN50930_c0_g3	2.0571	1.05e-07	up	--	Helix-loop-helix DNA-binding domain	Transcription factor bHLH120 OS=Arabidopsis thaliana OX=3702 GN=BHLH120 PE=2 SV=2	Transcription factor bHLH126 like [Actinidia chinensis var. chinensis]
TRINITY_DN51332_c0_g3	1.37742	2.89e-09	up	--	bHLH-MYC and R2R3-MYB transcription factors N-terminal;; Helix-loop-helix DNA-binding domain	Transcription factor bHLH14 OS=Arabidopsis thaliana OX=3702 GN=BHLH14 PE=1 SV=1	Transcription factor like [Actinidia chinensis var. chinensis]
TRINITY_DN46669_c0_g1	1.25014	5.22e-14	up	--	--	Transcription factor bHLH93 OS=Arabidopsis thaliana OX=3702 GN=BHLH93 PE=1 SV=1	transcription factor BHLH040, partial [Vaccinium corymbosum]
TRINITY_DN59438_c0_g2	1.98064	0.000381831	up	Helix-loop-helix DNA-binding domain	Transcription factor PIF7 OS=Arabidopsis thaliana OX=3702 GN=BHLH72 PE=1 SV=2	transcription factor BHLH041, partial [Vaccinium corymbosum]
TRINITY_DN44252_c0_g1	2.29107	0.000882043	up	Helix-loop-helix DNA-binding domain	Transcription factor bHLH87 OS=Arabidopsis thaliana OX=3702 GN=BHLH87 PE=1 SV=1	transcription factor bHLH87 isoform X2 [Manihot esculenta]
TRINITY_DN42619_c0_g1	2.29948	0.00139636	up	bHLH-MYC and R2R3-MYB transcription factors N-terminal;; Helix-loop-helix DNA-binding domain	Transcription factor bHLH14 OS=Arabidopsis thaliana OX=3702 GN=BHLH14 PE=1 SV=1	Transcription factor bHLH14 like [Actinidia chinensis var. chinensis]
TRINITY_DN44652_c0_g2	1.28435	0.00173259	up	Helix-loop-helix DNA-binding domain	Transcription factor bHLH91 OS=Arabidopsis thaliana OX=3702 GN=BHLH91 PE=2 SV=1	transcription factor BHLH026, partial [Vaccinium corymbosum]
TRINITY_DN53618_c2_g2	2.43216	0.0033225	up	Helix-loop-helix DNA-binding domain	Transcription factor bHLH120 OS=Arabidopsis thaliana OX=3702 GN=BHLH120 PE=2 SV=2	Transcription factor bHLH126 like [Actinidia chinensis var. chinensis]

## Sheet: Sheet2
Table S6. Candidate anthocyanin structural genes and transcription factor genes identified among DEGs in the petals of ‘Yanzhi Mi’ vs ‘Dayuanyangjin’ at S2 stage
	#id	baseMeanA	baseMeanB	log2(A2/B2)	pvalue	padj	regulated	COG_class	COG_class_annotation	GO_annotation	KEGG_annotation	KOG_class	KOG_class_annotation	Pfam_annotation	Swissprot_annotation	nr_annotation
PAL	TRINITY_DN56706_c2_g2	2655.13	8278.13	1.55326	7.46436e-13	8.07454e-11	up	[E]	Amino acid transport and metabolism	Cellular Component: cytoplasm (GO:0005737);; Biological Process: L-phenylalanine catabolic process (GO:0006559);; Biological Process: cinnamic acid biosynthetic process (GO:0009800);; Molecular Function: phenylalanine ammonia-lyase activity (GO:0045548);;	K10775|0.0|vvi:100245997|PAL;EC:4.3.1.24|hypothetical protein LOC100245997; K10775 phenylalanine ammonia-lyase [EC:4.3.1.24]	[Q]	Secondary metabolites biosynthesis, transport and catabolism	Aromatic amino acid lyase	Phenylalanine ammonia-lyase OS=Camellia sinensis OX=4442 GN=PAL PE=2 SV=1	Phenylalanine ammonia-lyase [Actinidia chinensis var. chinensis]
4CL	TRINITY_DN58522_c1_g1	1198.24	2854.54	1.21171	1.45039e-12	1.50166e-10	up	[IQ]	--	Molecular Function: ATP binding (GO:0005524);; Biological Process: phenylpropanoid metabolic process (GO:0009698);; Molecular Function: 4-coumarate-CoA ligase activity (GO:0016207);;	K01904|0.0|vvi:100245991|4CL;EC:6.2.1.12|4CL; 4-coumarate:CoA ligase; K01904 4-coumarate--CoA ligase [EC:6.2.1.12]	[I]	Lipid transport and metabolism	AMP-binding enzyme;; AMP-binding enzyme C-terminal domain	4-coumarate--CoA ligase 2 OS=Glycine max OX=3847 PE=2 SV=2	4-coumarate--CoA ligase like [Actinidia chinensis var. chinensis]
	TRINITY_DN62673_c2_g1	695.818	1606.77	1.1727	3.88541e-13	4.36785e-11	up	[IQ]	--	Molecular Function: ATP binding (GO:0005524);; Biological Process: phenylpropanoid metabolic process (GO:0009698);; Molecular Function: 4-coumarate-CoA ligase activity (GO:0016207);;	K01904|0.0|vvi:100254698|4CL;EC:6.2.1.12|hypothetical protein LOC100254698; K01904 4-coumarate--CoA ligase [EC:6.2.1.12]	[I]	Lipid transport and metabolism	AMP-binding enzyme;; AMP-binding enzyme	4-coumarate--CoA ligase 2 OS=Nicotiana tabacum OX=4097 GN=4CL2 PE=1 SV=1	4-coumarate--CoA ligase [Actinidia chinensis var. chinensis]
	TRINITY_DN67679_c1_g6	80.1957	34.3112	-1.09224	0.000249035	0.00445137	down	[IQ]	--	Molecular Function: fatty-acyl-CoA synthase activity (GO:0004321);; Molecular Function: ATP binding (GO:0005524);; Cellular Component: peroxisome (GO:0005777);; Biological Process: jasmonic acid biosynthetic process (GO:0009695);; Molecular Function: ligase activity (GO:0016874);; Biological Process: oxylipin biosynthetic process (GO:0031408);;	K01904|6e-62|pop:POPTR_837028|4CL;EC:6.2.1.12|Ptr4CL6, ACLL12; 4-coumarate-coa ligase; K01904 4-coumarate--CoA ligase [EC:6.2.1.12]	[I]	Lipid transport and metabolism	AMP-binding enzyme	4-coumarate--CoA ligase-like 7 OS=Arabidopsis thaliana OX=3702 GN=4CLL7 PE=1 SV=1	4-coumarate--CoA ligase-like [Actinidia chinensis var. chinensis]
CHS	TRINITY_DN49577_c0_g1	73.947	185.74	1.10067	0.00244743	0.0284801	up	--	--	Biological Process: flavonoid biosynthetic process (GO:0009813);; Molecular Function: naringenin-chalcone synthase activity (GO:0016210);;	K00660|5e-40|vvi:100263443|CHS;EC:2.3.1.74|CHS; chalcone synthase; K00660 chalcone synthase [EC:2.3.1.74]	--	--	Chalcone and stilbene synthases, C-terminal domain;; 3-Oxoacyl-[acyl-carrier-protein (ACP)] synthase III C terminal	Chalcone synthase OS=Vitis vinifera OX=29760 GN=CHS PE=2 SV=1	chalcone synthase [Vaccinium ashei]
	TRINITY_DN49577_c2_g2	299.056	707.467	1.07799	0.00096199	0.0135964	up	[Q]	Secondary metabolites biosynthesis, transport and catabolism	Biological Process: flavonoid biosynthetic process (GO:0009813);; Molecular Function: naringenin-chalcone synthase activity (GO:0016210);;	K00660|9e-61|pop:POPTR_579292|CHS;EC:2.3.1.74|CHS7; chalcone synthase (EC:2.3.1.74); K00660 chalcone synthase [EC:2.3.1.74]	--	--	Chalcone and stilbene synthases, C-terminal domain;; 3-Oxoacyl-[acyl-carrier-protein (ACP)] synthase III C terminal	Chalcone synthase OS=Casuarina glauca OX=3522 GN=CHS1 PE=2 SV=1	Chalcone synthase [Actinidia chinensis var. chinensis]
	TRINITY_DN49885_c2_g2	937.363	2104.81	1.06046	0.000135134	0.00266069	up	--	--	Biological Process: flavonoid biosynthetic process (GO:0009813);; Molecular Function: naringenin-chalcone synthase activity (GO:0016210);;	K00660|0.0|vvi:100258106|CHS;EC:2.3.1.74|CHS3; chalcone synthase	--	--	Chalcone and stilbene synthases, C-terminal domain;; Chalcone and stilbene synthases, N-terminal domain;; 3-Oxoacyl-[acyl-carrier-protein (ACP)] synthase III C terminal;; 3-Oxoacyl-[acyl-carrier-protein (ACP)] synthase III;; FAE1/Type III polyketide synthase-like protein	Chalcone synthase 3 OS=Camellia sinensis OX=4442 GN=CHS3 PE=2 SV=1	chalcone synthase [Rhododendron dauricum]
	TRINITY_DN49885_c2_g3	288.116	680.303	1.09717	0.000355847	0.0059632	up	[Q]	Secondary metabolites biosynthesis, transport and catabolism	Biological Process: flavonoid biosynthetic process (GO:0009813);; Molecular Function: naringenin-chalcone synthase activity (GO:0016210);;	K00660|1e-120|vvi:100258106|CHS;EC:2.3.1.74|CHS3; chalcone synthase	--	--	Chalcone and stilbene synthases, N-terminal domain;; Chalcone and stilbene synthases, C-terminal domain;; 3-Oxoacyl-[acyl-carrier-protein (ACP)] synthase III;; FAE1/Type III polyketide synthase-like protein	Chalcone synthase 1 OS=Camellia sinensis OX=4442 GN=CHS1 PE=2 SV=1	chalcone synthase [Rhododendron dauricum]
	TRINITY_DN60820_c3_g1	519.114	1296.87	1.1588	0.000250552	0.00446979	up	[Q]	Secondary metabolites biosynthesis, transport and catabolism	Biological Process: flavonoid biosynthetic process (GO:0009813);; Molecular Function: naringenin-chalcone synthase activity (GO:0016210);;	K00660|1e-38|vvi:100258106|CHS;EC:2.3.1.74|CHS3; chalcone synthase	--	--	Chalcone and stilbene synthases, C-terminal domain;; 3-Oxoacyl-[acyl-carrier-protein (ACP)] synthase III C terminal	Chalcone synthase RJ5 (Fragment) OS=Fragaria ananassa OX=3747 PE=2 SV=1	RecName: Full=Chalcone synthase RJ5; AltName: Full=Naringenin-chalcone synthase
	TRINITY_DN60820_c3_g2	829.144	1982.01	1.13758	5.86574e-05	0.00130033	up	--	--	Biological Process: flavonoid biosynthetic process (GO:0009813);; Molecular Function: naringenin-chalcone synthase activity (GO:0016210);;	K00660|1e-145|vvi:100263443|CHS;EC:2.3.1.74|CHS; chalcone synthase; K00660 chalcone synthase [EC:2.3.1.74]	--	--	Chalcone and stilbene synthases, C-terminal domain;; Chalcone and stilbene synthases, N-terminal domain;; 3-Oxoacyl-[acyl-carrier-protein (ACP)] synthase III;; FAE1/Type III polyketide synthase-like protein;; 3-Oxoacyl-[acyl-carrier-protein (ACP)] synthase III C terminal	Chalcone synthase OS=Vitis vinifera OX=29760 GN=CHS PE=2 SV=1	chalcone synthase [Vaccinium ashei]
CHI	TRINITY_DN57417_c1_g1	12.9258	34.5415	1.14016	0.00270577	0.030833	up	--	--	Cellular Component: endoplasmic reticulum (GO:0005783);; Biological Process: flavonoid biosynthetic process (GO:0009813);; Molecular Function: chalcone isomerase activity (GO:0045430);; Biological Process: response to karrikin (GO:0080167);;	--	--	--	--	Probable chalcone--flavonone isomerase 3 OS=Arabidopsis thaliana OX=3702 GN=CHI3 PE=1 SV=1	chalcone isomerase [Camellia sinensis]
F3H	TRINITY_DN67182_c3_g1	470.338	997.999	1.02467	3.64739e-06	0.000111305	up	[R]	General function prediction only	Biological Process: flavonoid biosynthetic process (GO:0009813);; Molecular Function: L-ascorbic acid binding (GO:0031418);; Molecular Function: naringenin 3-dioxygenase activity (GO:0045486);; Molecular Function: metal ion binding (GO:0046872);;	K00475|2e-96|pop:POPTR_270329|E1.14.11.9;EC:1.14.11.9|F3H6; flavanone 3-hydroxylase; K00475 naringenin 3-dioxygenase [EC:1.14.11.9]	[QR]	--	2OG-Fe(II) oxygenase superfamily	Naringenin,2-oxoglutarate 3-dioxygenase OS=Vitis vinifera OX=29760 GN=F3H PE=2 SV=1	flavanone-3-hydroxylase, partial [Ribes nigrum]
	TRINITY_DN67182_c3_g2	63.3936	137.05	1.01505	0.000178272	0.00334148	up	[R]	General function prediction only	Biological Process: flavonoid biosynthetic process (GO:0009813);; Molecular Function: L-ascorbic acid binding (GO:0031418);; Molecular Function: naringenin 3-dioxygenase activity (GO:0045486);; Molecular Function: metal ion binding (GO:0046872);;	K00475|2e-64|vvi:100253950|E1.14.11.9;EC:1.14.11.9|hypothetical protein LOC100253950	[QR]	--	non-haem dioxygenase in morphine synthesis N-terminal	Naringenin,2-oxoglutarate 3-dioxygenase OS=Malus domestica OX=3750 PE=2 SV=1	flavanone 3-hydroxylase, partial [Syzygium malaccense]
F3'H	TRINITY_DN68439_c2_g2	1009.18	2471.23	1.1828	1.04939e-05	0.000284633	up	[Q]	Secondary metabolites biosynthesis, transport and catabolism	Molecular Function: iron ion binding (GO:0005506);; Cellular Component: endoplasmic reticulum membrane (GO:0005789);; Biological Process: flavonoid biosynthetic process (GO:0009813);; Cellular Component: integral component of membrane (GO:0016021);; Molecular Function: flavonoid 3'-monooxygenase activity (GO:0016711);; Molecular Function: heme binding (GO:0020037);;	K05280|1e-102|vvi:100263810|E1.14.13.21;EC:1.14.13.21|hypothetical protein LOC100263810; K05280 flavonoid 3'-monooxygenase [EC:1.14.13.21]	[Q]	Secondary metabolites biosynthesis, transport and catabolism	Cytochrome P450	Flavonoid 3&apos;-monooxygenase OS=Petunia hybrida OX=4102 GN=CYP75B2 PE=2 SV=1	flavonoid 3&apos;-hydroxylase, partial [Rhododendron x pulchrum]
F3'5'H	TRINITY_DN58134_c0_g1	72.6197	547.167	2.72536	1.53148e-30	9.62232e-28	up	[Q]	Secondary metabolites biosynthesis, transport and catabolism	Molecular Function: iron ion binding (GO:0005506);; Cellular Component: endoplasmic reticulum (GO:0005783);; Biological Process: anthocyanin-containing compound biosynthetic process (GO:0009718);; Molecular Function: heme binding (GO:0020037);; Molecular Function: flavonoid 3',5'-hydroxylase activity (GO:0033772);;	K13083|0.0|vvi:100261319|CYP75A;EC:1.14.13.88|F3'5'H; flavonoid 3'5' hydroxylase; K13083 cytochrome P450, family 75, subfamily A (flavonoid 3',5'-hydroxylase) [EC:1.14.13.88]	[Q]	Secondary metabolites biosynthesis, transport and catabolism	Cytochrome P450	Flavonoid 3&apos;,5&apos;-hydroxylase 2 OS=Petunia hybrida OX=4102 GN=CYP75A3 PE=2 SV=1	flavonoid 3&apos;,5&apos;-hydroxylase [Rhododendron x pulchrum]
FLS	TRINITY_DN47990_c1_g1	1066.29	190.259	-2.29023	1.73063e-18	3.79795e-16	down	[R]	General function prediction only	Cellular Component: cytoplasm (GO:0005737);; Molecular Function: L-ascorbic acid binding (GO:0031418);; Molecular Function: flavonol synthase activity (GO:0045431);; Molecular Function: naringenin 3-dioxygenase activity (GO:0045486);; Molecular Function: metal ion binding (GO:0046872);;	K05278|1e-97|rcu:RCOM_1031460|FLS;EC:1.14.11.23|flavonol synthase, putative (EC:1.14.11.23); K05278 flavonol synthase [EC:1.14.11.23]	[QR]	--	2OG-Fe(II) oxygenase superfamily;; non-haem dioxygenase in morphine synthesis N-terminal	Flavonol synthase/flavanone 3-hydroxylase OS=Petunia hybrida OX=4102 GN=FL PE=2 SV=1	PREDICTED: flavonol synthase/flavanone 3-hydroxylase-like [Juglans regia]
	TRINITY_DN47990_c2_g3	1001.84	2273.99	1.05766	0.000362348	0.00605666	up	[R]	General function prediction only	Cellular Component: cytoplasm (GO:0005737);; Molecular Function: L-ascorbic acid binding (GO:0031418);; Molecular Function: flavonol synthase activity (GO:0045431);; Molecular Function: naringenin 3-dioxygenase activity (GO:0045486);; Molecular Function: metal ion binding (GO:0046872);;	K05278|1e-101|vvi:100249002|FLS;EC:1.14.11.23|similar to flavonol synthase; K05278 flavonol synthase [EC:1.14.11.23]	[QR]	--	2OG-Fe(II) oxygenase superfamily	Flavonol synthase/flavanone 3-hydroxylase OS=Petunia hybrida OX=4102 GN=FL PE=2 SV=1	flavonol synthase [Vaccinium corymbosum]
	TRINITY_DN60704_c1_g4	84.8531	194.445	1.1176	2.7329e-06	8.5972e-05	up	--	--	Cellular Component: cytoplasm (GO:0005737);; Molecular Function: L-ascorbic acid binding (GO:0031418);; Molecular Function: flavonol synthase activity (GO:0045431);; Molecular Function: naringenin 3-dioxygenase activity (GO:0045486);; Molecular Function: metal ion binding (GO:0046872);;	K05278|1e-69|vvi:100267819|FLS;EC:1.14.11.23|hypothetical protein LOC100267819	[QR]	--	--	Flavonol synthase/flavanone 3-hydroxylase OS=Citrus unshiu OX=55188 GN=FLS PE=1 SV=1	flavonol synthase, partial [Rhododendron x pulchrum]
DFR	TRINITY_DN67151_c2_g1	156.164	479.988	1.39064	3.42195e-05	0.000811536	up	--	--	Biological Process: anthocyanin-containing compound biosynthetic process (GO:0009718);; Molecular Function: dihydrokaempferol 4-reductase activity (GO:0045552);; Molecular Function: flavanone 4-reductase activity (GO:0047890);; Molecular Function: coenzyme binding (GO:0050662);;	K13082|4e-11|pop:POPTR_206006|DFR;EC:1.1.1.219 1.1.1.234|DFR2; dihydroflavonol 4-reductase (EC:1.1.1.219); K13082 bifunctional dihydroflavonol 4-reductase/flavanone 4-reductase [EC:1.1.1.219 1.1.1.234]	[V]	Defense mechanisms	--	Dihydroflavonol 4-reductase OS=Antirrhinum majus OX=4151 GN=DFRA PE=2 SV=1	dihydroflavonol reductase, partial [Rhododendron simsii]
	TRINITY_DN67151_c2_g3	65.7047	195.596	1.45374	1.3702e-08	7.16597e-07	up	[MG]	--	Biological Process: anthocyanin-containing compound biosynthetic process (GO:0009718);; Molecular Function: dihydrokaempferol 4-reductase activity (GO:0045552);; Molecular Function: flavanone 4-reductase activity (GO:0047890);; Molecular Function: coenzyme binding (GO:0050662);;	K13082|6e-62|vvi:100233141|DFR;EC:1.1.1.219 1.1.1.234|DFR, dfr1; dihydroflavonol reductase; K13082 bifunctional dihydroflavonol 4-reductase/flavanone 4-reductase [EC:1.1.1.219 1.1.1.234]	[V]	Defense mechanisms	NAD dependent epimerase/dehydratase family	Dihydroflavonol 4-reductase OS=Vitis vinifera OX=29760 GN=DFR PE=1 SV=1	dihydroflavonol 4-reductase, partial [Rhododendron x pulchrum]
ANS	TRINITY_DN66271_c1_g3	269.804	878.199	1.54754	2.40298e-08	1.20322e-06	up	--	--	Biological Process: anthocyanin-containing compound biosynthetic process (GO:0009718);; Molecular Function: L-ascorbic acid binding (GO:0031418);; Molecular Function: metal ion binding (GO:0046872);; Molecular Function: leucocyanidin oxygenase activity (GO:0050589);;	K05277|1e-57|vvi:100233142|ANS;EC:1.14.11.19|LDOX, ANS; leucoanthocyanidin dioxygenase; K05277 leucoanthocyanidin dioxygenase [EC:1.14.11.19]	[QR]	--	2OG-Fe(II) oxygenase superfamily	Leucoanthocyanidin dioxygenase OS=Malus domestica OX=3750 GN=ANS PE=2 SV=1	anthocyanidin synthase, partial [Rhododendron x pulchrum]
3GT	TRINITY_DN52552_c0_g1	74.5104	228.538	1.21767	5.46397e-05	0.00769441	up	--	--	Biological Process: anthocyanin-containing compound biosynthetic process (GO:0009718);; Molecular Function: anthocyanidin 3-O-glucosyltransferase activity (GO:0047213);;	--	[GC]	--	--	Anthocyanidin 3-O-glucosyltransferase 4 (Fragment) OS=Manihot esculenta OX=3983 GN=GT4 PE=2 SV=1	UDP-glycosyltransferase [Actinidia chinensis var. chinensis]
	TRINITY_DN62746_c0_g1	51.4652	9.97049	-1.85715	2.46538e-06	7.86896e-05	down	--	--	Biological Process: anthocyanin-containing compound biosynthetic process (GO:0009718);; Molecular Function: anthocyanidin 3-O-glucosyltransferase activity (GO:0047213);;	K12356|0.0|vvi:100266832|UGT72E;EC:2.4.1.111|hypothetical protein LOC100266832	[GC]	--	UDP-glucoronosyl and UDP-glucosyl transferase	Anthocyanidin 3-O-glucosyltransferase 5 OS=Manihot esculenta OX=3983 GN=GT5 PE=2 SV=1	Anthocyanidin 3-O-glucosyltransferase [Actinidia chinensis var. chinensis]
5,3GT	TRINITY_DN64021_c3_g2	269.462	115.512	-1.09891	0.000177095	0.00332758	down	--	--	Biological Process: anthocyanin-containing compound biosynthetic process (GO:0009718);; Molecular Function: transferase activity, transferring hexosyl groups (GO:0016758);;	--	[GC]	--	--	Anthocyanidin 5,3-O-glucosyltransferase OS=Rosa hybrid cultivar OX=128735 GN=RhGT1 PE=2 SV=1	UDP-glycosyltransferase 88A1-like [Quercus suber]
MYB	TRINITY_DN62378_c2_g1	976.266	86.3077	-2.99097	8.35208e-19	1.88708e-16	down	--	--	Molecular Function: DNA binding (GO:0003677);; Molecular Function: DNA-binding transcription factor activity (GO:0003700);; Cellular Component: nucleus (GO:0005634);; Biological Process: transcription, DNA-templated (GO:0006351);; Biological Process: circadian rhythm (GO:0007623);; Biological Process: response to cold (GO:0009409);; Biological Process: response to salt stress (GO:0009651);; Biolo…	K12133|1e-57|vvi:100250535|LHY;LHY|hypothetical protein LOC100250535	[O]	Posttranslational modification, protein turnover, chaperones	Myb-like DNA-binding domain	Protein CCA1 OS=Arabidopsis thaliana OX=3702 GN=CCA1 PE=1 SV=1	lhy1, partial [Populus tremula]
	TRINITY_DN64867_c0_g1	257.079	113.84	-1.04687	0.000543935	0.00852927	down	--	--	Molecular Function: RNA polymerase II transcription factor activity, sequence-specific DNA binding (GO:0000981);; Molecular Function: transcription factor activity, RNA polymerase II transcription factor recruiting (GO:0001135);; Molecular Function: DNA-binding transcription factor activity (GO:0003700);; Cellular Component: nucleus (GO:0005634);; Biological Process: transcription, DNA-templated …	K09422|6e-17|vvi:100243253|--|MYBA6; R2R3 MYB transcription factor; K09422 myb proto-oncogene protein, plant	[K]	Transcription	--	Transcription factor MYB113 OS=Arabidopsis thaliana OX=3702 GN=MYB113 PE=1 SV=1	transcription factor MYB1, partial [Vaccinium corymbosum]
	TRINITY_DN51472_c0_g2	21.9143	6.16009	-1.26236	0.0043436	0.0443014	down	--	--	Molecular Function: DNA binding (GO:0003677);; Cellular Component: nucleus (GO:0005634);; Biological Process: transcription, DNA-templated (GO:0006351);; Biological Process: regulation of transcription, DNA-templated (GO:0006355);;	K09422|5e-23|osa:4347052|--|Os09g0414300; K09422 myb proto-oncogene protein, plant	[K]	Transcription	--	Myb-related protein 306 OS=Antirrhinum majus OX=4151 GN=MYB306 PE=2 SV=1	PREDICTED: LOW QUALITY PROTEIN: myb-related protein 306 [Oryza sativa Japonica Group]
	TRINITY_DN63601_c3_g1	162.084	69.6026	-1.13765	1.95487e-06	6.40442e-05	down	--	--	Molecular Function: DNA binding (GO:0003677);; Molecular Function: DNA-binding transcription factor activity (GO:0003700);; Cellular Component: nucleus (GO:0005634);; Cellular Component: cytoplasm (GO:0005737);; Biological Process: transcription, DNA-templated (GO:0006351);; Biological Process: circadian rhythm (GO:0007623);; Biological Process: response to salt stress (GO:0009651);; Biological P…	--	[O]	Posttranslational modification, protein turnover, chaperones	Myb-like DNA-binding domain	Protein REVEILLE 4 OS=Arabidopsis thaliana OX=3702 GN=RVE4 PE=1 SV=1	Homeodomain-like protein [Cynara cardunculus var. scolymus]
	TRINITY_DN52302_c2_g1	2504.22	633.723	-1.83192	8.27101e-13	8.90512e-11	down	--	--	Molecular Function: DNA binding (GO:0003677);; Cellular Component: nucleus (GO:0005634);; Biological Process: transcription, DNA-templated (GO:0006351);; Biological Process: regulation of transcription, DNA-templated (GO:0006355);;	--	[K]	Transcription	--	Myb-related protein 340 OS=Antirrhinum majus OX=4151 GN=MYB340 PE=2 SV=1	--
	TRINITY_DN59028_c0_g2	334.9	153.468	-1.07483	8.65395e-08	3.91056e-06	down	--	--	Molecular Function: DNA binding (GO:0003677);; Molecular Function: DNA-binding transcription factor activity (GO:0003700);; Cellular Component: nucleus (GO:0005634);; Biological Process: transcription, DNA-templated (GO:0006351);; Biological Process: regulation of transcription, DNA-templated (GO:0006355);; Biological Process: circadian rhythm (GO:0007623);; Biological Process: auxin-activated si…	--	[O]	Posttranslational modification, protein turnover, chaperones	Myb-like DNA-binding domain	Protein REVEILLE 1 OS=Arabidopsis thaliana OX=3702 GN=RVE1 PE=2 SV=1	Protein REVEILLE like [Actinidia chinensis var. chinensis]
	TRINITY_DN47821_c0_g1	554.713	269.35	-1.00748	8.03611e-09	4.40363e-07	down	[KAD]	--	Molecular Function: RNA polymerase II transcription factor activity, sequence-specific DNA binding (GO:0000981);; Molecular Function: transcription factor activity, RNA polymerase II transcription factor recruiting (GO:0001135);; Molecular Function: DNA-binding transcription factor activity (GO:0003700);; Cellular Component: nucleus (GO:0005634);; Biological Process: regulation of transcription b…	K09422|1e-89|vvi:100253438|--|hypothetical protein LOC100253438; K09422 myb proto-oncogene protein, plant	[K]	Transcription	Myb-like DNA-binding domain;; Myb-like DNA-binding domain	Transcription factor MYB101 OS=Arabidopsis thaliana OX=3702 GN=MYB101 PE=2 SV=1	Transcription factor GAMYB like [Actinidia chinensis var. chinensis]
	TRINITY_DN51453_c1_g2	12.1543	0.608304	-1.80636	0.000182657	0.00341402	down	[KAD]	--	Molecular Function: DNA binding (GO:0003677);; Cellular Component: nucleus (GO:0005634);; Biological Process: transcription, DNA-templated (GO:0006351);; Biological Process: regulation of transcription, DNA-templated (GO:0006355);; Biological Process: response to salt (GO:1902074);;	K09422|1e-92|pop:POPTR_564352|--|MYB212; hypothetical protein; K09422 myb proto-oncogene protein, plant	[K]	Transcription	Myb-like DNA-binding domain;; Myb-like DNA-binding domain	Transcription factor MYB78 OS=Arabidopsis thaliana OX=3702 GN=MYB78 PE=2 SV=1	transcription factor MYB108 [Prunus avium]
	TRINITY_DN67187_c1_g5	118.507	30.3429	-1.74396	8.47803e-09	4.64026e-07	down	[KAD]	--	Molecular Function: DNA binding (GO:0003677);; Cellular Component: nucleus (GO:0005634);; Biological Process: transcription, DNA-templated (GO:0006351);; Biological Process: regulation of transcription, DNA-templated (GO:0006355);;	K09422|2e-58|vvi:100233097|--|MYB24; R2R3 Myb24 transcription factor; K09422 myb proto-oncogene protein, plant	[K]	Transcription	Myb-like DNA-binding domain;; Myb-like DNA-binding domain	Myb-related protein 305 OS=Antirrhinum majus OX=4151 GN=MYB305 PE=2 SV=1	MYB-related transcription factor [Salvia miltiorrhiza]
	TRINITY_DN49281_c1_g6	388.577	60.7726	-2.44289	3.90957e-19	9.24311e-17	down	[KAD]	--	Molecular Function: DNA binding (GO:0003677);; Cellular Component: nucleus (GO:0005634);; Biological Process: transcription, DNA-templated (GO:0006351);; Biological Process: regulation of transcription, DNA-templated (GO:0006355);;	K09422|5e-22|pop:POPTR_778373|--|MYB204; hypothetical protein; K09422 myb proto-oncogene protein, plant	[K]	Transcription	--	Myb-related protein 305 OS=Antirrhinum majus OX=4151 GN=MYB305 PE=2 SV=1	Myb-related protein [Actinidia chinensis var. chinensis]
	TRINITY_DN58809_c0_g4	67.3971	15.1829	-1.77095	1.50007e-06	5.0491e-05	down	--	--	Molecular Function: DNA binding (GO:0003677);; Cellular Component: nucleus (GO:0005634);; Biological Process: transcription, DNA-templated (GO:0006351);; Biological Process: regulation of transcription, DNA-templated (GO:0006355);; Biological Process: flower development (GO:0009908);; Biological Process: determination of dorsal/ventral asymmetry (GO:0048262);;	--	[O]	Posttranslational modification, protein turnover, chaperones	Myb-like DNA-binding domain;; Myb-like DNA-binding domain	Transcription factor DIVARICATA OS=Antirrhinum majus OX=4151 GN=DIVARICATA PE=2 SV=1	Transcription factor DIVARICATA like [Actinidia chinensis var. chinensis]
	TRINITY_DN59015_c3_g2	47.75	3.62121	-2.62812	8.38856e-10	5.53597e-08	down	--	--	Molecular Function: RNA polymerase II transcription factor activity, sequence-specific DNA binding (GO:0000981);; Molecular Function: transcription factor activity, RNA polymerase II transcription factor recruiting (GO:0001135);; Molecular Function: DNA-binding transcription factor activity (GO:0003700);; Cellular Component: nucleus (GO:0005634);; Biological Process: transcription, DNA-templated …	K09422|3e-76|pop:POPTR_566874|--|MYB036; hypothetical protein; K09422 myb proto-oncogene protein, plant	[K]	Transcription	--	Transcription factor MYB108 OS=Arabidopsis thaliana OX=3702 GN=MYB108 PE=1 SV=1	hypothetical protein POPTR_010G149900v3 [Populus trichocarpa]
	TRINITY_DN55156_c1_g2	115.839	266.695	1.08613	0.00013506	0.00266069	up	--	--	Molecular Function: RNA polymerase II transcription factor activity, sequence-specific DNA binding (GO:0000981);; Molecular Function: transcription factor activity, RNA polymerase II transcription factor recruiting (GO:0001135);; Molecular Function: DNA-binding transcription factor activity (GO:0003700);; Cellular Component: nucleus (GO:0005634);; Biological Process: transcription, DNA-templated …	--	--	--	--	MYB-like transcription factor ETC1 OS=Arabidopsis thaliana OX=3702 GN=ETC1 PE=2 SV=1	MYB-like transcription factor ETC1 [Rosa chinensis]
	TRINITY_DN53621_c6_g1	2.51917	13.8243	1.3875	0.00345448	0.0373511	up	[KAD]	--	Molecular Function: RNA polymerase II transcription factor activity, sequence-specific DNA binding (GO:0000981);; Molecular Function: transcription factor activity, RNA polymerase II transcription factor recruiting (GO:0001135);; Molecular Function: DNA-binding transcription factor activity (GO:0003700);; Cellular Component: nucleus (GO:0005634);; Biological Process: transcription, DNA-templated …	K09422|1e-130|vvi:100262671|--|hypothetical protein LOC100262671; K09422 myb proto-oncogene protein, plant	[K]	Transcription	Myb-like DNA-binding domain;; Myb-like DNA-binding domain	Transcription factor RAX3 OS=Arabidopsis thaliana OX=3702 GN=RAX3 PE=2 SV=1	Transcription factor like [Actinidia chinensis var. chinensis]
	TRINITY_DN62502_c1_g3	21.2553	57.9247	1.23151	0.000305194	0.00524468	up	[KAD]	--	Molecular Function: RNA polymerase II transcription factor activity, sequence-specific DNA binding (GO:0000981);; Molecular Function: transcription factor activity, RNA polymerase II transcription factor recruiting (GO:0001135);; Cellular Component: nucleus (GO:0005634);; Biological Process: transcription, DNA-templated (GO:0006351);; Biological Process: regulation of transcription by RNA polymer…	--	[K]	Transcription	Myb-like DNA-binding domain;; Myb-like DNA-binding domain	Transcription factor MYB82 OS=Arabidopsis thaliana OX=3702 GN=MYB82 PE=1 SV=1	Transcription factor like [Actinidia chinensis var. chinensis]
	TRINITY_DN55019_c0_g2	1.46116	18.0202	1.92087	5.34754e-05	0.00119878	up	--	--	Molecular Function: DNA binding (GO:0003677);; Molecular Function: DNA-binding transcription factor activity (GO:0003700);; Cellular Component: nucleus (GO:0005634);; Biological Process: transcription, DNA-templated (GO:0006351);; Biological Process: regulation of transcription, DNA-templated (GO:0006355);;	--	--	--	Myb-like DNA-binding domain	Putative Myb family transcription factor At1g14600 OS=Arabidopsis thaliana OX=3702 GN=At1g14600 PE=2 SV=2	hypothetical protein VITISV_025194 [Vitis vinifera]
	TRINITY_DN48576_c0_g2	977.397	2680.81	1.36033	1.19171e-08	6.33763e-07	up	[KAD]	--	Molecular Function: RNA polymerase II transcription factor activity, sequence-specific DNA binding (GO:0000981);; Molecular Function: transcription factor activity, RNA polymerase II transcription factor recruiting (GO:0001135);; Molecular Function: DNA-binding transcription factor activity (GO:0003700);; Cellular Component: nucleus (GO:0005634);; Biological Process: transcription, DNA-templated …	K09422|5e-79|vvi:100232899|--|MYBPA1; MYBPA1 protein; K09422 myb proto-oncogene protein, plant	[K]	Transcription	Myb-like DNA-binding domain;; Myb-like DNA-binding domain	Transcription repressor MYB5 OS=Arabidopsis thaliana OX=3702 GN=MYB5 PE=1 SV=1	transcription factor MYB9, partial [Vaccinium corymbosum]
	TRINITY_DN64568_c0_g1	712.416	1498.35	1.02732	1.12165e-07	4.89956e-06	up	[KAD]	--	Cellular Component: condensed chromosome (GO:0000793);; Molecular Function: RNA polymerase II transcription factor activity, sequence-specific DNA binding (GO:0000981);; Molecular Function: transcription factor activity, RNA polymerase II transcription factor recruiting (GO:0001135);; Molecular Function: DNA binding (GO:0003677);; Molecular Function: DNA-binding transcription factor activity (GO:…	K09422|0.0|vvi:100256209|--|hypothetical protein LOC100256209; K09422 myb proto-oncogene protein, plant	[K]	Transcription	Myb-like DNA-binding domain;; Myb-like DNA-binding domain	Transcription factor AS1 OS=Arabidopsis thaliana OX=3702 GN=AS1 PE=1 SV=1	PREDICTED: transcription factor AS1 [Vitis vinifera]
	TRINITY_DN48267_c5_g1	25.3707	98.0351	1.72886	1.08147e-08	5.81508e-07	up	[KAD]	--	--	K09422|1e-118|vvi:100245564|--|hypothetical protein LOC100245564; K09422 myb proto-oncogene protein, plant	[K]	Transcription	Myb-like DNA-binding domain;; Myb-like DNA-binding domain	Transcription factor MYB106 OS=Arabidopsis thaliana OX=3702 GN=MYB106 PE=2 SV=1	Transcription factor like [Actinidia chinensis var. chinensis]
	TRINITY_DN59175_c2_g1	19.3866	74.3023	1.61411	6.05712e-06	0.000175833	up	[KAD]	--	Molecular Function: RNA polymerase II transcription factor activity, sequence-specific DNA binding (GO:0000981);; Molecular Function: transcription factor activity, RNA polymerase II transcription factor recruiting (GO:0001135);; Molecular Function: DNA-binding transcription factor activity (GO:0003700);; Cellular Component: nucleus (GO:0005634);; Biological Process: transcription, DNA-templated …	K09422|3e-80|vvi:100250750|--|hypothetical protein LOC100250750; K09422 myb proto-oncogene protein, plant	[K]	Transcription	Myb-like DNA-binding domain;; Myb-like DNA-binding domain	Transcription repressor MYB6 OS=Arabidopsis thaliana OX=3702 GN=MYB6 PE=1 SV=1	putative MYB transcription factor [Diospyros kaki]
	TRINITY_DN56421_c2_g1	51.3913	141.597	1.35742	4.95589e-08	2.35307e-06	up	[KAD]	--	--	K09422|1e-102|pop:POPTR_571286|--|MYB052; hypothetical protein; K09422 myb proto-oncogene protein, plant	[K]	Transcription	Myb-like DNA-binding domain;; Myb-like DNA-binding domain	Transcription factor CSA OS=Oryza sativa subsp. japonica OX=39947 GN=CSA PE=2 SV=2	PREDICTED: myb-related protein B-like [Juglans regia]
	TRINITY_DN58936_c3_g1	106.428	246.361	1.07762	0.000346352	0.00583122	up	[KAD]	--	Molecular Function: DNA binding (GO:0003677);; Cellular Component: nucleus (GO:0005634);; Biological Process: transcription, DNA-templated (GO:0006351);; Biological Process: regulation of transcription, DNA-templated (GO:0006355);;	K09422|4e-46|vvi:100240800|--|hypothetical protein LOC100240800; K09422 myb proto-oncogene protein, plant	[K]	Transcription	Myb-like DNA-binding domain;; Myb-like DNA-binding domain	Anthocyanin regulatory C1 protein OS=Zea mays OX=4577 GN=C1 PE=2 SV=1	PREDICTED: myb-related protein 308 [Theobroma cacao]
	TRINITY_DN62118_c0_g1	59.625	146.046	1.19703	1.83797e-06	6.04738e-05	up	--	--	Molecular Function: RNA polymerase II transcription factor activity, sequence-specific DNA binding (GO:0000981);; Molecular Function: transcription factor activity, RNA polymerase II transcription factor recruiting (GO:0001135);; Molecular Function: DNA binding (GO:0003677);; Molecular Function: DNA-binding transcription factor activity (GO:0003700);; Cellular Component: nucleus (GO:0005634);; Bi…	K09422|4e-24|pop:POPTR_776076|--|MYB071; hypothetical protein; K09422 myb proto-oncogene protein, plant	[K]	Transcription	--	Transcription factor WER OS=Arabidopsis thaliana OX=3702 GN=WER PE=1 SV=1	Transcription factor WER like [Actinidia chinensis var. chinensis]
	TRINITY_DN49554_c0_g1	19.4385	53.4751	1.22426	0.000514925	0.00814745	up	--	--	Molecular Function: RNA polymerase II transcription factor activity, sequence-specific DNA binding (GO:0000981);; Molecular Function: transcription factor activity, RNA polymerase II transcription factor recruiting (GO:0001135);; Molecular Function: DNA-binding transcription factor activity (GO:0003700);; Molecular Function: ATP binding (GO:0005524);; Cellular Component: nucleus (GO:0005634);; Bi…	K09422|2e-24|vvi:100244605|--|hypothetical protein LOC100244605; K09422 myb proto-oncogene protein, plant	[K]	Transcription	--	Transcription factor TT2 OS=Arabidopsis thaliana OX=3702 GN=TT2 PE=1 SV=1	transcription factor MYB5e [Camellia sinensis]
	TRINITY_DN57141_c1_g1	460.82	955.373	1.00936	9.726e-08	4.35212e-06	up	--	--	Molecular Function: DNA binding (GO:0003677);; Molecular Function: DNA-binding transcription factor activity (GO:0003700);; Cellular Component: nucleus (GO:0005634);; Biological Process: transcription, DNA-templated (GO:0006351);; Biological Process: circadian rhythm (GO:0007623);; Biological Process: positive regulation of circadian rhythm (GO:0042753);;	--	--	--	Myb-like DNA-binding domain	Transcription factor LUX OS=Arabidopsis thaliana OX=3702 GN=LUX PE=1 SV=1	Transcription factor LUX like [Actinidia chinensis var. chinensis]
	TRINITY_DN50379_c2_g3	67.4952	166.836	1.21945	4.10689e-07	1.58425e-05	up	[KAD]	--	--	K09422|1e-156|vvi:100240910|--|hypothetical protein LOC100240910; K09422 myb proto-oncogene protein, plant	[K]	Transcription	Myb-like DNA-binding domain;; Myb-like DNA-binding domain	Transcription factor MYB61 OS=Arabidopsis thaliana OX=3702 GN=MYB61 PE=2 SV=1	Transcription factor like [Actinidia chinensis var. chinensis]
bHLH	TRINITY_DN49581_c1_g2	842.748	221.846	-1.8587	4.77724e-26	2.2589e-23	down	--	--	Molecular Function: DNA binding (GO:0003677);; Molecular Function: DNA-binding transcription factor activity (GO:0003700);; Cellular Component: nucleus (GO:0005634);; Biological Process: transcription, DNA-templated (GO:0006351);; Biological Process: regulation of transcription, DNA-templated (GO:0006355);;	--	--	--	--	Transcription factor bHLH60 OS=Arabidopsis thaliana OX=3702 GN=BHLH60 PE=1 SV=1	transcription factor BHLH044, partial [Vaccinium corymbosum]
	TRINITY_DN44252_c0_g1	45.9181	110.721	1.09777	0.000882043	0.012702	up	--	--	Molecular Function: DNA binding (GO:0003677);; Molecular Function: DNA-binding transcription factor activity (GO:0003700);; Cellular Component: nucleus (GO:0005634);; Biological Process: transcription, DNA-templated (GO:0006351);; Biological Process: regulation of transcription, DNA-templated (GO:0006355);;	--	--	--	Helix-loop-helix DNA-binding domain	Transcription factor bHLH87 OS=Arabidopsis thaliana OX=3702 GN=BHLH87 PE=1 SV=1	transcription factor bHLH87 isoform X2 [Manihot esculenta]
	TRINITY_DN59438_c0_g2	25.613	63.2147	1.14007	0.000381831	0.00632743	up	--	--	Molecular Function: double-stranded DNA binding (GO:0003690);; Molecular Function: DNA-binding transcription factor activity (GO:0003700);; Biological Process: transcription, DNA-templated (GO:0006351);; Biological Process: regulation of transcription, DNA-templated (GO:0006355);; Biological Process: response to light stimulus (GO:0009416);; Biological Process: red, far-red light phototransductio…	--	--	--	Helix-loop-helix DNA-binding domain	Transcription factor PIF7 OS=Arabidopsis thaliana OX=3702 GN=BHLH72 PE=1 SV=2	transcription factor BHLH041, partial [Vaccinium corymbosum]
	TRINITY_DN42619_c0_g1	10.142	31.4428	1.27289	0.00139636	0.0182465	up	--	--	Molecular Function: DNA binding (GO:0003677);; Molecular Function: DNA-binding transcription factor activity (GO:0003700);; Cellular Component: nucleus (GO:0005634);; Cellular Component: cytoplasm (GO:0005737);; Biological Process: transcription, DNA-templated (GO:0006351);; Biological Process: regulation of transcription, DNA-templated (GO:0006355);;	--	--	--	bHLH-MYC and R2R3-MYB transcription factors N-terminal;; Helix-loop-helix DNA-binding domain	Transcription factor bHLH14 OS=Arabidopsis thaliana OX=3702 GN=BHLH14 PE=1 SV=1	Transcription factor bHLH14 like [Actinidia chinensis var. chinensis]
	TRINITY_DN50930_c0_g3	17.9685	73.509	1.75234	1.05274e-07	4.62941e-06	up	--	--	Molecular Function: RNA polymerase II regulatory region sequence-specific DNA binding (GO:0000977);; Biological Process: transcription, DNA-templated (GO:0006351);; Biological Process: regulation of transcription by RNA polymerase II (GO:0006357);; Cellular Component: RNA polymerase II transcription factor complex (GO:0090575);;	--	--	--	Helix-loop-helix DNA-binding domain	Transcription factor bHLH120 OS=Arabidopsis thaliana OX=3702 GN=BHLH120 PE=2 SV=2	Transcription factor bHLH126 like [Actinidia chinensis var. chinensis]
	TRINITY_DN51332_c0_g3	94.1009	260.297	1.37714	2.88674e-09	1.72176e-07	up	--	--	Molecular Function: DNA binding (GO:0003677);; Molecular Function: DNA-binding transcription factor activity (GO:0003700);; Cellular Component: nucleus (GO:0005634);; Cellular Component: cytoplasm (GO:0005737);; Biological Process: transcription, DNA-templated (GO:0006351);; Biological Process: regulation of transcription, DNA-templated (GO:0006355);;	--	--	--	bHLH-MYC and R2R3-MYB transcription factors N-terminal;; Helix-loop-helix DNA-binding domain	Transcription factor bHLH14 OS=Arabidopsis thaliana OX=3702 GN=BHLH14 PE=1 SV=1	Transcription factor like [Actinidia chinensis var. chinensis]
	TRINITY_DN46669_c0_g1	226.155	645.748	1.45006	5.21766e-14	6.72228e-12	up	--	--	Molecular Function: DNA binding (GO:0003677);; Molecular Function: DNA-binding transcription factor activity (GO:0003700);; Cellular Component: nucleus (GO:0005634);; Biological Process: transcription, DNA-templated (GO:0006351);; Biological Process: multicellular organism development (GO:0007275);;	--	--	--	--	Transcription factor bHLH93 OS=Arabidopsis thaliana OX=3702 GN=BHLH93 PE=1 SV=1	transcription factor BHLH040, partial [Vaccinium corymbosum]
	TRINITY_DN44652_c0_g2	14.0966	40.9462	1.22138	0.00173258	0.0216826	up	--	--	Molecular Function: DNA binding (GO:0003677);; Molecular Function: DNA-binding transcription factor activity (GO:0003700);; Cellular Component: nucleus (GO:0005634);; Biological Process: transcription, DNA-templated (GO:0006351);; Biological Process: regulation of transcription, DNA-templated (GO:0006355);; Biological Process: pollen development (GO:0009555);; Biological Process: anther wall tape…	--	--	--	Helix-loop-helix DNA-binding domain	Transcription factor bHLH91 OS=Arabidopsis thaliana OX=3702 GN=BHLH91 PE=2 SV=1	transcription factor BHLH026, partial [Vaccinium corymbosum]
	TRINITY_DN53618_c2_g2	3.95016	17.8548	1.35875	0.00332251	0.0361714	up	--	--	Molecular Function: RNA polymerase II regulatory region sequence-specific DNA binding (GO:0000977);; Biological Process: transcription, DNA-templated (GO:0006351);; Biological Process: regulation of transcription by RNA polymerase II (GO:0006357);; Cellular Component: RNA polymerase II transcription factor complex (GO:0090575);;	--	--	--	Helix-loop-helix DNA-binding domain	Transcription factor bHLH120 OS=Arabidopsis thaliana OX=3702 GN=BHLH120 PE=2 SV=2	Transcription factor bHLH126 like [Actinidia chinensis var. chinensis]
