# Supplementary material for: Comparative transcriptome analyses reveal genes related to pigmentation in the petals of a flower color variation cultivar of Rhododendron obtusum
Source: Research Square preprint supplement (doi:10.21203/rs.3.rs-263287/v1), 2021-03-03
Supplement: Supplementary file 3 [file 73e2635e11a7c25f1db7dda7.xlsx]

## Sheet: B2_vs_A2.Mix.Kegg
Table S5. DEGs of the KEGG database in 'Yanzhi Mi’petals at S2 stage
#Gene_id	KO|e_value|Database_Genes|Enzyme_name|Anno
TRINITY_DN62673_c2_g1	K01904|0.0|vvi:100254698|4CL;EC:6.2.1.12|hypothetical protein LOC100254698; K01904 4-coumarate--CoA ligase [EC:6.2.1.12]
TRINITY_DN62746_c0_g1	K12356|0.0|vvi:100266832|UGT72E;EC:2.4.1.111|hypothetical protein LOC100266832
TRINITY_DN62770_c0_g1	K04077|0.0|vvi:100251252|groEL, HSPD1;groEL, HSPD1|hypothetical protein LOC100251252
TRINITY_DN62791_c1_g1	K01365|1e-150|vvi:100242026|CTSL;EC:3.4.22.15|hypothetical protein LOC100242026; K01365 cathepsin L [EC:3.4.22.15]
TRINITY_DN62885_c4_g2	K11294|3e-63|vvi:100262769|NCL, NSR1;NCL, NSR1|hypothetical protein LOC100262769; K11294 nucleolin
TRINITY_DN62896_c0_g1	K13946|0.0|vvi:100253820|AUX1, LAX;AUX1, LAX|hypothetical protein LOC100253820; K13946 auxin influx carrier (AUX1 LAX family)
TRINITY_DN62934_c2_g1	K01193|0.0|vvi:100232951|INV, sacA;EC:3.2.1.26|CWINV; cell wall apoplastic invertase; K01193 beta-fructofuranosidase [EC:3.2.1.26]
TRINITY_DN62954_c0_g4	K00748|2e-19|pop:POPTR_246835|lpxB;EC:2.4.1.182|hypothetical protein; K00748 lipid-A-disaccharide synthase [EC:2.4.1.182]
TRINITY_DN63109_c1_g5	K14484|9e-87|vvi:100254204|IAA;IAA|hypothetical protein LOC100254204
TRINITY_DN63161_c0_g1	K01669|2e-97|vvi:100252689|--|hypothetical protein LOC100252689; K01669 deoxyribodipyrimidine photo-lyase [EC:4.1.99.3]
TRINITY_DN63345_c0_g2	K20547|1e-34|vvi:100266184|CHIB;EC:3.2.1.14|hypothetical protein LOC100266184
TRINITY_DN63403_c2_g1	K00383|0.0|vvi:100254507|GSR, gor;EC:1.8.1.7|hypothetical protein LOC100254507; K00383 glutathione reductase (NADPH) [EC:1.8.1.7]
TRINITY_DN63423_c3_g3	K04122|1e-150|rcu:RCOM_1592560|GA3, CYP701;EC:1.14.13.78|ent-kaurene oxidase, putative (EC:1.14.13.78); K04122 ent-kaurene oxidase [EC:1.14.13.78]
TRINITY_DN63692_c4_g1	K20547|7e-53|vvi:100266184|CHIB;EC:3.2.1.14|hypothetical protein LOC100266184
TRINITY_DN63692_c4_g2	K01183|1e-76|vvi:100233089|E3.2.1.14;EC:3.2.1.14|CHI1B; class I extracellular chitinase
TRINITY_DN63704_c0_g3	K14431|1e-162|pop:POPTR_1085955|TGA;TGA|hypothetical protein; K14431 transcription factor TGA
TRINITY_DN63733_c2_g3	K15397|2e-62|vvi:100251061|KCS;EC:2.3.1.199|hypothetical protein LOC100251061
TRINITY_DN63930_c1_g7	K00844|7e-14|rcu:RCOM_1488780|HK;EC:2.7.1.1|hexokinase, putative (EC:2.7.1.1); K00844 hexokinase [EC:2.7.1.1]
TRINITY_DN64134_c0_g1	K11000|0.0|vvi:100248918|--|hypothetical protein LOC100248918; K11000 callose synthase [EC:2.4.1.-]
TRINITY_DN64198_c0_g1	K10875|0.0|vvi:100250037|RAD54L, RAD54;EC:3.6.4.-|hypothetical protein LOC100250037
TRINITY_DN64225_c1_g1	K01193|0.0|vvi:100256970|INV, sacA;EC:3.2.1.26|hypothetical protein LOC100256970
TRINITY_DN64225_c1_g2	K01193|1e-140|vvi:100241232|INV, sacA;EC:3.2.1.26|similar to vacuolar invertase 2, GIN2; K01193 beta-fructofuranosidase [EC:3.2.1.26]
TRINITY_DN64273_c0_g4	K11000|0.0|vvi:100248918|--|hypothetical protein LOC100248918; K11000 callose synthase [EC:2.4.1.-]
TRINITY_DN64381_c0_g4	K04506|1e-27|vvi:100260463|SIAH1;EC:2.3.2.27|hypothetical protein LOC100260463
TRINITY_DN64438_c1_g1	K08912|1e-73|pop:POPTR_709740|LHCB1;LHCB1|light-harvesting complex II chlorophyll-a/b binding protein (Lhcb); K08912 light-harvesting complex II chlorophyll a/b binding protein 1
TRINITY_DN64438_c2_g2	K08912|4e-19|zma:100193833|LHCB1;LHCB1|lhcb7; light harvesting complex mesophyll7
TRINITY_DN64473_c1_g1	K13066|1e-36|vvi:100265990|E2.1.1.68, COMT;EC:2.1.1.68|hypothetical protein LOC100265990
TRINITY_DN64484_c1_g1	K06901|0.0|pop:POPTR_596945|--|hypothetical protein; K06901 putative MFS transporter, AGZA family, xanthine/uracil permease
TRINITY_DN64543_c1_g2	K09699|9e-94|vvi:100244742|DBT, bkdB;EC:2.3.1.168|hypothetical protein LOC100244742; K09699 2-oxoisovalerate dehydrogenase E2 component (dihydrolipoyl transacylase) [EC:2.3.1.168]
TRINITY_DN64563_c1_g1	K00857|7e-37|rcu:RCOM_1120040|tdk, TK;EC:2.7.1.21|thymidine kinase, putative (EC:2.7.1.21); K00857 thymidine kinase [EC:2.7.1.21]
TRINITY_DN64568_c0_g1	K09422|0.0|vvi:100256209|--|hypothetical protein LOC100256209; K09422 myb proto-oncogene protein, plant
TRINITY_DN64665_c1_g5	K05868|0.0|vvi:100261859|CCNB1;CCNB1|hypothetical protein LOC100261859; K05868 cyclin B
TRINITY_DN64670_c1_g1	K01530|0.0|rcu:RCOM_0654980|--|Phospholipid-transporting ATPase, putative (EC:3.6.3.1); K01530 phospholipid-translocating ATPase [EC:3.6.3.1]
TRINITY_DN64835_c0_g3	K12153|0.0|vvi:100246526|CYP79A2;EC:1.14.14.40|hypothetical protein LOC100246526; K12153 cytochrome P450, family 79, subfamily A, polypeptide 2 [EC:1.14.13.-]
TRINITY_DN64867_c0_g1	K09422|6e-17|vvi:100243253|--|MYBA6; R2R3 MYB transcription factor; K09422 myb proto-oncogene protein, plant
TRINITY_DN64886_c1_g3	K02983|1e-27|zma:100282946|RP-S30e, RPS30;RP-S30e, RPS30|gpm447; LOC100282946; K02983 small subunit ribosomal protein S30e
TRINITY_DN65020_c0_g2	K01535|0.0|vvi:100267065|PMA1, PMA2;EC:3.6.3.6|hypothetical protein LOC100267065; K01535 H+-transporting ATPase [EC:3.6.3.6]
TRINITY_DN65068_c1_g2	K01188|1e-76|vvi:100252190|E3.2.1.21;EC:3.2.1.21|hypothetical protein LOC100252190
TRINITY_DN65163_c0_g4	K00558|0.0|vvi:100258788|DNMT1, dcm;EC:2.1.1.37|hypothetical protein LOC100258788; K00558 DNA (cytosine-5-)-methyltransferase [EC:2.1.1.37]
TRINITY_DN65279_c1_g2	K10398|0.0|vvi:100255345|--|hypothetical protein LOC100255345; K10398 kinesin family member 11
TRINITY_DN65334_c1_g1	K10534|0.0|vvi:100264320|NR;EC:1.7.1.1 1.7.1.2 1.7.1.3|similar to nitrate reductase
TRINITY_DN65423_c1_g1	K02698|5e-30|pop:POPTR_802453|psaK;psaK|photosystem I reaction center subunit X (PsaK); K02698 photosystem I subunit X
TRINITY_DN65434_c0_g1	K09458|2e-16|vvi:100242694|fabF;acyl-carrier-protein|similar to 3-oxoacyl-[acyl-carrier-protein] synthase; K09458 3-oxoacyl-[acyl-carrier-protein] synthase II [EC:2.3.1.179]
TRINITY_DN65503_c0_g1	K00166|1e-18|vvi:100258429|BCKDHA, bkdA1;EC:1.2.4.4|hypothetical protein LOC100258429; K00166 2-oxoisovalerate dehydrogenase E1 component, alpha subunit [EC:1.2.4.4]
TRINITY_DN65509_c0_g1	K01535|8e-14|vvi:100267065|PMA1, PMA2;EC:3.6.3.6|hypothetical protein LOC100267065; K01535 H+-transporting ATPase [EC:3.6.3.6]
TRINITY_DN65509_c1_g1	K01535|1e-152|pop:POPTR_578576|PMA1, PMA2;EC:3.6.3.6|autoinhibited H+ ATPase; K01535 H+-transporting ATPase [EC:3.6.3.6]
TRINITY_DN65509_c3_g2	K01535|0.0|vvi:100242786|PMA1, PMA2;EC:3.6.3.6|hypothetical protein LOC100242786; K01535 H+-transporting ATPase [EC:3.6.3.6]
TRINITY_DN65528_c0_g3	K02694|2e-66|rcu:RCOM_1426230|psaF;psaF|Photosystem I reaction center subunit III, chloroplast precursor, putative; K02694 photosystem I subunit III
TRINITY_DN65894_c0_g3	K01728|1e-54|rcu:RCOM_0697960|pel;EC:4.2.2.2|Pectate lyase precursor, putative (EC:4.2.2.2); K01728 pectate lyase [EC:4.2.2.2]
TRINITY_DN65894_c0_g4	K01728|1e-100|rcu:RCOM_0697960|pel;EC:4.2.2.2|Pectate lyase precursor, putative (EC:4.2.2.2); K01728 pectate lyase [EC:4.2.2.2]
TRINITY_DN65987_c0_g1	K03671|3e-53|vvi:100246832|trxA;trxA|hypothetical protein LOC100246832; K03671 thioredoxin 1
TRINITY_DN66123_c0_g7	K18857|1e-115|vvi:100232853|ADH1;EC:1.1.1.1|ADH1, GV-ADH1; alcohol dehydrogenase 1; K00001 alcohol dehydrogenase [EC:1.1.1.1]
TRINITY_DN66243_c0_g1	K02540|0.0|vvi:100266163|MCM2;EC:3.6.4.12|hypothetical protein LOC100266163; K02540 minichromosome maintenance protein 2
TRINITY_DN66271_c1_g3	K05277|1e-57|vvi:100233142|ANS;EC:1.14.11.19|LDOX, ANS; leucoanthocyanidin dioxygenase; K05277 leucoanthocyanidin dioxygenase [EC:1.14.11.19]
TRINITY_DN66669_c0_g2	K14488|1e-31|vvi:100240974|SAUR;SAUR|hypothetical protein LOC100240974; K14488 SAUR family protein
TRINITY_DN66684_c0_g1	K12124|0.0|vvi:100254197|GI;GI|hypothetical protein LOC100254197
TRINITY_DN66752_c0_g2	K00547|7e-74|pop:POPTR_658494|mmuM, BHMT2;EC:2.1.1.10|HMT2; homocysteine s-methyltransferase (EC:2.1.1.10); K00547 homocysteine S-methyltransferase [EC:2.1.1.10]
TRINITY_DN66823_c1_g1	K14488|3e-40|vvi:100256532|SAUR;SAUR|hypothetical protein LOC100256532; K14488 SAUR family protein
TRINITY_DN66871_c2_g1	K00487|4e-35|pop:POPTR_823837|CYP73A;EC:1.14.13.11|C4H2, CYP73A42; cytochrome P450 cinnamate 4-hydroxylase (EC:1.14.13.11); K00487 trans-cinnamate 4-monooxygenase [EC:1.14.13.11]
TRINITY_DN66898_c0_g1	K11253|9e-84|zma:100192589|H3;H3|H3C4, H3C2, H3C3; Histone H3.2; K11253 histone H3
TRINITY_DN67151_c2_g1	K13082|4e-11|pop:POPTR_206006|DFR;EC:1.1.1.219 1.1.1.234|DFR2; dihydroflavonol 4-reductase (EC:1.1.1.219); K13082 bifunctional dihydroflavonol 4-reductase/flavanone 4-reductase [EC:1.1.1.219 1.1.1.234]
TRINITY_DN67151_c2_g3	K13082|6e-62|vvi:100233141|DFR;EC:1.1.1.219 1.1.1.234|DFR, dfr1; dihydroflavonol reductase; K13082 bifunctional dihydroflavonol 4-reductase/flavanone 4-reductase [EC:1.1.1.219 1.1.1.234]
TRINITY_DN67182_c3_g1	K00475|2e-96|pop:POPTR_270329|E1.14.11.9;EC:1.14.11.9|F3H6; flavanone 3-hydroxylase; K00475 naringenin 3-dioxygenase [EC:1.14.11.9]
TRINITY_DN67182_c3_g2	K00475|2e-64|vvi:100253950|E1.14.11.9;EC:1.14.11.9|hypothetical protein LOC100253950
TRINITY_DN67187_c1_g5	K09422|2e-58|vvi:100233097|--|MYB24; R2R3 Myb24 transcription factor; K09422 myb proto-oncogene protein, plant
TRINITY_DN67199_c1_g5	K05868|1e-158|vvi:100261859|CCNB1;CCNB1|hypothetical protein LOC100261859; K05868 cyclin B
TRINITY_DN67200_c1_g1	K12355|0.0|rcu:RCOM_1053300|REF1;EC:1.2.1.68|aldehyde dehydrogenase, putative (EC:1.2.1.36); K12355 coniferyl-aldehyde dehydrogenase [EC:1.2.1.68]
TRINITY_DN67265_c1_g1	K00001|4e-79|rcu:RCOM_0236080|E1.1.1.1, adh;EC:1.1.1.1|alcohol dehydrogenase, putative (EC:1.1.1.284); K00001 alcohol dehydrogenase [EC:1.1.1.1]
TRINITY_DN67265_c1_g2	K18857|1e-123|vvi:100232853|ADH1;EC:1.1.1.1|ADH1, GV-ADH1; alcohol dehydrogenase 1; K00001 alcohol dehydrogenase [EC:1.1.1.1]
TRINITY_DN67415_c2_g1	K01568|0.0|rcu:RCOM_0489390|PDC, pdc;EC:4.1.1.1|pyruvate decarboxylase, putative (EC:4.1.1.1); K01568 pyruvate decarboxylase [EC:4.1.1.1]
TRINITY_DN67415_c2_g2	K01568|2e-36|ath:AT5G01320|PDC, pdc;EC:4.1.1.1|pyruvate decarboxylase, putative (EC:4.1.1.1); K01568 pyruvate decarboxylase [EC:4.1.1.1]
TRINITY_DN67446_c0_g1	K02883|2e-16|vvi:100254541|RP-L18e, RPL18;RP-L18e, RPL18|hypothetical protein LOC100254541; K02883 large subunit ribosomal protein L18e
TRINITY_DN67517_c1_g6	K05359|3e-40|vvi:100267022|ADT, PDT;EC:4.2.1.91 4.2.1.51|hypothetical protein
TRINITY_DN67630_c0_g3	K01723|9e-17|vvi:100264033|AOS;EC:4.2.1.92|hypothetical protein LOC100264033
TRINITY_DN67668_c3_g1	K00430|1e-80|pop:POPTR_565406|E1.11.1.7;EC:1.11.1.7|hypothetical protein; K00430 peroxidase [EC:1.11.1.7]
TRINITY_DN67679_c1_g6	K01904|6e-62|pop:POPTR_837028|4CL;EC:6.2.1.12|Ptr4CL6, ACLL12; 4-coumarate-coa ligase; K01904 4-coumarate--CoA ligase [EC:6.2.1.12]
TRINITY_DN67730_c1_g2	K13691|1e-102|vvi:100242294|--|hypothetical protein LOC100242294; K13691 pathogen-inducible salicylic acid glucosyltransferase [EC:2.4.1.-]
TRINITY_DN67747_c2_g3	K04077|2e-08|vvi:100266920|groEL, HSPD1;groEL, HSPD1|hypothetical protein LOC100266920
TRINITY_DN67748_c1_g1	K08235|0.0|pop:POPTR_708892|--|hypothetical protein; K08235 xyloglucan:xyloglucosyl transferase [EC:2.4.1.207]
TRINITY_DN67806_c0_g3	K07374|2e-48|vcn:VOLCADRAFT_108723|TUBA;TUBA|tubA1b; alpha tubulin
TRINITY_DN67839_c1_g1	K01188|0.0|vvi:100260409|E3.2.1.21;EC:3.2.1.21|hypothetical protein LOC100260409
TRINITY_DN67881_c2_g2	K00626|7e-14|rcu:RCOM_0690990|E2.3.1.9, atoB;EC:2.3.1.9|acetyl-CoA acetyltransferase, mitochondrial, putative (EC:2.3.1.9); K00626 acetyl-CoA C-acetyltransferase [EC:2.3.1.9]
TRINITY_DN68008_c1_g3	K10143|0.0|vvi:100257557|RFWD2, COP1;EC:2.3.2.27|hypothetical protein LOC100257557
TRINITY_DN68171_c1_g4	K14488|2e-14|pop:POPTR_556560|SAUR;SAUR|SAUR82; SAUR family protein; K14488 SAUR family protein
TRINITY_DN68173_c1_g1	K13289|1e-169|rcu:RCOM_0962680|CTSA, CPY;EC:3.4.16.5|serine carboxypeptidase, putative (EC:3.4.16.6); K13289 cathepsin A (carboxypeptidase C) [EC:3.4.16.5]
TRINITY_DN68189_c0_g2	K08695|2e-68|pop:POPTR_831060|ANR;EC:1.3.1.77|ANR/BAN1; anthocyanidin reductase (EC:1.3.1.77); K08695 anthocyanidin reductase [EC:1.3.1.77]
TRINITY_DN68283_c3_g1	K00021|2e-96|vvi:100243051|HMGCR;EC:1.1.1.34|hypothetical protein LOC100243051; K00021 hydroxymethylglutaryl-CoA reductase (NADPH) [EC:1.1.1.34]
TRINITY_DN68298_c0_g1	K15404|2e-39|vvi:100262701|K15404, CER1;EC:4.1.99.5|hypothetical protein LOC100262701
TRINITY_DN68437_c5_g1	K01602|3e-67|ath:AT1G67090|rbcS;EC:4.1.1.39|RBCS1A; RBCS1A (RIBULOSE BISPHOSPHATE CARBOXYLASE SMALL CHAIN 1A); copper ion binding / ribulose-bisphosphate carboxylase (EC:4.1.1.39); K01602 ribulose-bisphosphate carboxylase small chain [EC:4.1.1.39]
TRINITY_DN68439_c2_g2	K05280|1e-102|vvi:100263810|E1.14.13.21;EC:1.14.13.21|hypothetical protein LOC100263810; K05280 flavonoid 3'-monooxygenase [EC:1.14.13.21]
TRINITY_DN68489_c1_g4	K00430|1e-166|vvi:100260726|E1.11.1.7;EC:1.11.1.7|hypothetical protein LOC100260726
TRINITY_DN68542_c0_g1	K01611|7e-13|rcu:RCOM_0596710|speD, AMD1;EC:4.1.1.50|s-adenosylmethionine decarboxylase, putative (EC:4.1.1.50); K01611 S-adenosylmethionine decarboxylase [EC:4.1.1.50]
TRINITY_DN68587_c3_g3	K15813|1e-100|vvi:100256581|LUP4;EC:5.4.99.39|hypothetical protein LOC100256581
TRINITY_DN68611_c4_g4	K01530|2e-95|osa:4341328|--|Os06g0565900; K01530 phospholipid-translocating ATPase [EC:3.6.3.1]
TRINITY_DN68668_c1_g1	K14611|2e-65|rcu:RCOM_1118530|--|purine permease, putative; K14611 solute carrier family 23 (nucleobase transporter), member 1/2
TRINITY_DN68747_c2_g2	K04077|0.0|vvi:100266920|groEL, HSPD1;groEL, HSPD1|hypothetical protein LOC100266920
TRINITY_DN68765_c5_g1	K03164|1e-120|vvi:100253371|TOP2;EC:5.99.1.3|hypothetical protein LOC100253371; K03164 DNA topoisomerase II [EC:5.99.1.3]
TRINITY_DN68789_c6_g1	K01535|2e-26|pop:POPTR_826518|PMA1, PMA2;EC:3.6.3.6|autoinhibited H+ ATPase; K01535 H+-transporting ATPase [EC:3.6.3.6]
TRINITY_DN68827_c2_g1	K00688|0.0|vvi:100251865|PYG, glgP;EC:2.4.1.1|hypothetical protein LOC100251865; K00688 starch phosphorylase [EC:2.4.1.1]
TRINITY_DN69021_c3_g2	K00640|2e-10|vvi:100246391|cysE;EC:2.3.1.30|hypothetical protein LOC100246391; K00640 serine O-acetyltransferase [EC:2.3.1.30]
TRINITY_DN69113_c1_g1	K01530|0.0|rcu:RCOM_0654980|--|Phospholipid-transporting ATPase, putative (EC:3.6.3.1); K01530 phospholipid-translocating ATPase [EC:3.6.3.1]
TRINITY_DN43562_c0_g1	K10781|1e-166|rcu:RCOM_1505510|FATB;EC:3.1.2.14 3.1.2.21|palmitoyl-acyl carrier protein thioesterase (EC:3.1.2.14); K10781 fatty acyl-ACP thioesterase B [EC:3.1.2.14 3.1.2.-]
TRINITY_DN44322_c0_g1	K01213|1e-71|pop:POPTR_552472|E3.2.1.67;EC:3.2.1.67|hypothetical protein; K01213 galacturan 1,4-alpha-galacturonidase [EC:3.2.1.67]
TRINITY_DN44587_c0_g1	K00430|0.0|rcu:RCOM_0533480|E1.11.1.7;EC:1.11.1.7|Peroxidase 72 precursor, putative (EC:1.11.1.7); K00430 peroxidase [EC:1.11.1.7]
TRINITY_DN44671_c0_g1	K02537|1e-115|rcu:RCOM_1081200|MAD2;MAD2|plant mitotic spindle assembly checkpoint protein mad2, putative; K02537 mitotic spindle assembly checkpoint protein MAD2
TRINITY_DN44756_c0_g1	K06628|0.0|vvi:100253995|CDC45;CDC45|hypothetical protein LOC100253995; K06628 cell division control protein 45
TRINITY_DN44834_c0_g1	K13993|1e-105|pop:POPTR_1095126|HSP20;HSP20|hypothetical protein; K13993 HSP20 family protein
TRINITY_DN44889_c0_g1	K08908|1e-123|rcu:RCOM_0711000|LHCA2;LHCA2|chlorophyll A/B binding protein, putative; K08908 light-harvesting complex I chlorophyll a/b binding protein 2
TRINITY_DN44934_c0_g1	K01213|1e-151|vvi:100265436|E3.2.1.67;EC:3.2.1.67|hypothetical protein LOC100265436
TRINITY_DN45049_c0_g2	K00318|8e-55|vvi:100254983|PRODH;EC:1.5.-.-|hypothetical protein LOC100254983; K00318 proline dehydrogenase [EC:1.5.99.8]
TRINITY_DN45210_c0_g1	K08515|1e-118|rcu:RCOM_0923570|VAMP7;VAMP7|Vesicle-associated membrane protein, putative; K08515 vesicle-associated membrane protein 7
TRINITY_DN45269_c0_g1	K00430|1e-137|vvi:100267361|E1.11.1.7;EC:1.11.1.7|hypothetical protein LOC100267361; K00430 peroxidase [EC:1.11.1.7]
TRINITY_DN45343_c0_g2	K10733|1e-103|vvi:100264816|--|hypothetical protein LOC100264816; K10733 GINS complex subunit 2
TRINITY_DN45376_c0_g1	K10880|1e-132|vvi:100251380|XRCC3;XRCC3|hypothetical protein LOC100251380; K10880 DNA-repair protein XRCC3
TRINITY_DN45476_c0_g1	K21026|1e-159|vvi:100252867|AAE;EC:3.1.1.80|hypothetical protein LOC100252867
TRINITY_DN45536_c0_g1	K01728|0.0|vvi:100267540|pel;EC:4.2.2.2|pectate lyase-like protein 3; K01728 pectate lyase [EC:4.2.2.2]
TRINITY_DN45634_c0_g1	K10960|0.0|vvi:100253115|chlP, bchP;EC:1.3.1.83 1.3.1.111|hypothetical protein LOC100253115; K10960 geranylgeranyl reductase [EC:1.3.1.83]
TRINITY_DN45635_c0_g1	K01602|3e-16|vvi:100267942|rbcS;EC:4.1.1.39|hypothetical protein LOC100267942; K01602 ribulose-bisphosphate carboxylase small chain [EC:4.1.1.39]
TRINITY_DN45685_c1_g2	K02541|0.0|vvi:100253704|MCM3;EC:3.6.4.12|hypothetical protein LOC100253704; K02541 minichromosome maintenance protein 3
TRINITY_DN45693_c0_g1	K12823|6e-44|osa:9271802|DDX5, DBP2;EC:3.6.4.13|Os01g0911100
TRINITY_DN45908_c0_g1	K12734|1e-111|pop:POPTR_709764|--|hypothetical protein; K12734 peptidyl-prolyl cis-trans isomerase-like 3 [EC:5.2.1.8]
TRINITY_DN45922_c0_g1	K07374|2e-09|ppp:PHYPADRAFT_29741|TUBA;TUBA|hypothetical protein
TRINITY_DN46026_c0_g2	K00083|6e-22|vvi:100247559|E1.1.1.195;EC:1.1.1.195|hypothetical protein LOC100247559
TRINITY_DN46026_c0_g5	K00083|1e-71|vvi:100252642|E1.1.1.195;EC:1.1.1.195|hypothetical protein LOC100252642
TRINITY_DN46068_c4_g1	K06966|1e-120|vvi:100256973|--|hypothetical protein LOC100256973; K06966
TRINITY_DN46139_c0_g1	K10739|1e-124|vvi:100245725|RFA2, RPA2;RFA2, RPA2|hypothetical protein LOC100245725; K10739 replication factor A2
TRINITY_DN46319_c0_g2	K13066|2e-25|vvi:100255690|E2.1.1.68, COMT;EC:2.1.1.68|hypothetical protein LOC100255690
TRINITY_DN46472_c3_g1	K00430|2e-62|vvi:100261865|E1.11.1.7;EC:1.11.1.7|hypothetical protein LOC100261865; K00430 peroxidase [EC:1.11.1.7]
TRINITY_DN46472_c3_g4	K00430|1e-66|vvi:100261865|E1.11.1.7;EC:1.11.1.7|hypothetical protein LOC100261865; K00430 peroxidase [EC:1.11.1.7]
TRINITY_DN46579_c3_g1	K02209|2e-58|ath:AT2G07690|MCM5, CDC46;EC:3.6.4.12|minichromosome maintenance family protein / MCM family protein; K02209 minichromosome maintenance protein 5 (cell division control protein 46)
TRINITY_DN46620_c1_g1	K09872|1e-169|rcu:RCOM_1356060|--|Aquaporin PIP2.2, putative; K09872 aquaporin PIP
TRINITY_DN46865_c1_g2	K10143|1e-159|ath:AT2G32950|RFWD2, COP1;EC:2.3.2.27|COP1; COP1 (CONSTITUTIVE PHOTOMORPHOGENIC 1); protein binding / ubiquitin-protein ligase; K10143 E3 ubiquitin-protein ligase RFWD2 [EC:6.3.2.19]
TRINITY_DN46893_c0_g3	K13963|3e-94|pop:POPTR_677784|SERPINB;SERPINB|hypothetical protein; K13963 serpin B
TRINITY_DN46948_c0_g1	K09286|2e-77|vvi:100252531|--|hypothetical protein LOC100252531; K09286 EREBP-like factor
TRINITY_DN46991_c1_g3	K08235|1e-74|rcu:RCOM_0474040|--|Xyloglucan endotransglucosylase/hydrolase protein 2 precursor, putative (EC:2.4.1.207); K08235 xyloglucan:xyloglucosyl transferase [EC:2.4.1.207]
TRINITY_DN47035_c1_g2	K12489|0.0|vvi:100254173|ACAP;ACAP|hypothetical protein LOC100254173; K12489 Arf-GAP with coiled-coil, ANK repeat and PH domain-containing protein
TRINITY_DN47222_c1_g3	K16040|5e-61|vvi:100260643|ROMT;EC:2.1.1.240|hypothetical protein LOC100260643
TRINITY_DN47233_c0_g1	K14500|1e-63|vvi:100261407|BSK;EC:2.7.11.1|hypothetical protein LOC100261407
TRINITY_DN47348_c2_g1	K13789|1e-101|rcu:RCOM_0082580|GGPS;EC:2.5.1.1 2.5.1.10 2.5.1.29|geranyl geranyl pyrophosphate synthase, putative (EC:2.5.1.29); K13789 geranylgeranyl diphosphate synthase, type II [EC:2.5.1.1 2.5.1.10 2.5.1.29]
TRINITY_DN47355_c0_g1	K13754|0.0|vvi:100246655|--|hypothetical protein LOC100246655; K13754 solute carrier family 24 (sodium/potassium/calcium exchanger), member 6
TRINITY_DN47391_c1_g6	K01365|1e-153|rcu:RCOM_1043080|CTSL;EC:3.4.22.15|cysteine protease, putative (EC:1.3.1.74); K01365 cathepsin L [EC:3.4.22.15]
TRINITY_DN47418_c0_g2	K01244|6e-45|pop:POPTR_818154|MTN;EC:3.2.2.16|5'-methylthioadenosine nucleosidase (EC:3.2.2.16); K01244 5'-methylthioadenosine nucleosidase [EC:3.2.2.16]
TRINITY_DN47454_c1_g1	K07375|1e-135|vvi:100259087|TUBB;TUBB|hypothetical protein LOC100259087; K07375 tubulin beta
TRINITY_DN47648_c4_g2	K01674|4e-41|vvi:100259742|cah;EC:4.2.1.1|hypothetical protein LOC100259742; K01674 carbonic anhydrase [EC:4.2.1.1]
TRINITY_DN47737_c1_g1	K01662|0.0|rcu:RCOM_0410350|dxs;EC:2.2.1.7|1-deoxyxylulose-5-phosphate synthase, putative (EC:2.2.1.7); K01662 1-deoxy-D-xylulose-5-phosphate synthase [EC:2.2.1.7]
TRINITY_DN47821_c0_g1	K09422|1e-89|vvi:100253438|--|hypothetical protein LOC100253438; K09422 myb proto-oncogene protein, plant
TRINITY_DN47826_c0_g1	K13356|0.0|vvi:100259719|FAR;EC:1.2.1.84|hypothetical protein LOC100259719
TRINITY_DN47925_c1_g1	K13448|1e-87|pop:POPTR_562236|CML;CML|hypothetical protein; K13448 calcium-binding protein CML
TRINITY_DN47990_c1_g1	K05278|1e-97|rcu:RCOM_1031460|FLS;EC:1.14.11.23|flavonol synthase, putative (EC:1.14.11.23); K05278 flavonol synthase [EC:1.14.11.23]
TRINITY_DN47990_c2_g3	K05278|1e-101|vvi:100249002|FLS;EC:1.14.11.23|similar to flavonol synthase; K05278 flavonol synthase [EC:1.14.11.23]
TRINITY_DN47994_c0_g5	K01530|1e-22|pop:POPTR_592804|--|aminophospholipid ATPase; K01530 phospholipid-translocating ATPase [EC:3.6.3.1]
TRINITY_DN47996_c1_g1	K14563|1e-120|ath:AT4G25630|NOP1, FBL;EC:2.1.1.-|FIB2; FIB2 (FIBRILLARIN 2); snoRNA binding; K14563 rRNA 2'-O-methyltransferase fibrillarin [EC:2.1.1.-]
TRINITY_DN48006_c0_g2	K14505|1e-144|vvi:100253927|CYCD3;CYCD3|hypothetical protein LOC100253927
TRINITY_DN48092_c3_g1	K09286|4e-61|vvi:100246641|--|hypothetical protein LOC100246641; K09286 EREBP-like factor
TRINITY_DN48110_c0_g1	K10746|1e-177|vvi:100262876|EXO1;EC:3.1.-.-|hypothetical protein LOC100262876; K10746 exonuclease 1 [EC:3.1.-.-]
TRINITY_DN48165_c2_g1	K13195|6e-61|pop:POPTR_712972|--|hypothetical protein; K13195 cold-inducible RNA-binding protein
TRINITY_DN48223_c1_g1	K04802|7e-42|vvi:100248466|PCNA;PCNA|hypothetical protein LOC100248466; K04802 proliferating cell nuclear antigen
TRINITY_DN48256_c0_g1	K03454|1e-107|vvi:100265259|--|hypothetical protein LOC100265259; K03454 mitochondrial carrier protein, MC family
TRINITY_DN48267_c5_g1	K09422|1e-118|vvi:100245564|--|hypothetical protein LOC100245564; K09422 myb proto-oncogene protein, plant
TRINITY_DN48278_c2_g1	K14487|0.0|rcu:RCOM_0032550|GH3;GH3|Indole-3-acetic acid-amido synthetase GH3.6, putative; K14487 auxin responsive GH3 gene family
TRINITY_DN48387_c0_g1	K19355|6e-97|vvi:100261910|MAN;EC:3.2.1.78|hypothetical protein LOC100261910
TRINITY_DN48442_c5_g1	K02891|2e-35|rcu:RCOM_0681450|RP-L22e, RPL22;RP-L22e, RPL22|60S ribosomal protein L22, putative; K02891 large subunit ribosomal protein L22e
TRINITY_DN48576_c0_g2	K09422|5e-79|vvi:100232899|--|MYBPA1; MYBPA1 protein; K09422 myb proto-oncogene protein, plant
TRINITY_DN48644_c0_g1	K07195|0.0|vvi:100258036|EXOC7, EXO70;EXOC7, EXO70|hypothetical protein LOC100258036; K07195 exocyst complex component 7
TRINITY_DN48663_c0_g4	K14325|1e-06|sbi:SORBI_03g046480|RNPS1;RNPS1|hypothetical protein; K14325 RNA-binding protein with serine-rich domain 1
TRINITY_DN48692_c1_g2	K11251|1e-54|pop:POPTR_710129|H2A;H2A|HTA904; histone 2; K11251 histone H2A
TRINITY_DN48713_c0_g2	K13680|6e-27|pop:POPTR_832480|--|hypothetical protein; K13680 beta-mannan synthase [EC:2.4.1.32]
TRINITY_DN48724_c0_g1	K14504|1e-150|rcu:RCOM_1630040|TCH4;EC:2.4.1.207|hypothetical protein; K14504 xyloglucan:xyloglucosyl transferase TCH4 [EC:2.4.1.207]
TRINITY_DN48728_c0_g1	K06688|5e-89|rcu:RCOM_1578930|UBE2C, UBC11;EC:2.3.2.23|ubiquitin-conjugating enzyme E2 C, putative (EC:6.3.2.19); K06688 ubiquitin-conjugating enzyme E2 C [EC:6.3.2.19]
TRINITY_DN48807_c0_g1	K13449|1e-22|vvi:100263556|PR1;PR1|hypothetical protein LOC100263556
TRINITY_DN48836_c0_g1	K07374|0.0|vvi:100260286|TUBA;TUBA|hypothetical protein LOC100260286; K07374 tubulin alpha
TRINITY_DN48905_c1_g1	K08679|0.0|rcu:RCOM_0782170|E5.1.3.6;EC:5.1.3.6|UDP-glucuronate 5-epimerase, putative (EC:5.1.3.12); K08679 UDP-glucuronate 4-epimerase [EC:5.1.3.6]
TRINITY_DN48970_c2_g1	K00430|7e-90|vvi:100249514|E1.11.1.7;EC:1.11.1.7|hypothetical protein LOC100249514
TRINITY_DN48974_c0_g2	K01535|1e-135|pop:POPTR_826518|PMA1, PMA2;EC:3.6.3.6|autoinhibited H+ ATPase; K01535 H+-transporting ATPase [EC:3.6.3.6]
TRINITY_DN49023_c0_g1	K11790|0.0|rcu:RCOM_1064120|--|Cell division cycle protein cdt2, putative; K11790 denticleless
TRINITY_DN49037_c1_g3	K00799|4e-41|vvi:100245065|GST, gst;EC:2.5.1.18|hypothetical protein LOC100245065
TRINITY_DN49051_c0_g1	K00430|1e-135|vvi:100249955|E1.11.1.7;EC:1.11.1.7|hypothetical protein LOC100249955; K00430 peroxidase [EC:1.11.1.7]
TRINITY_DN49085_c0_g2	K10808|0.0|rcu:RCOM_1677000|RRM2;EC:1.17.4.1|ribonucleoside-diphosphate reductase small chain, putative (EC:1.17.4.1); K10808 ribonucleoside-diphosphate reductase subunit M2 [EC:1.17.4.1]
TRINITY_DN49281_c1_g6	K09422|5e-22|pop:POPTR_778373|--|MYB204; hypothetical protein; K09422 myb proto-oncogene protein, plant
TRINITY_DN49326_c0_g1	K02684|0.0|vvi:100260326|PRI1;EC:2.7.7.-|hypothetical protein LOC100260326; K02684 DNA primase small subunit [EC:2.7.7.-]
TRINITY_DN49406_c0_g1	K00759|1e-118|pop:POPTR_669073|APRT, apt;EC:2.4.2.7|adenine phosphoribosyltransferase (EC:2.4.2.7); K00759 adenine phosphoribosyltransferase [EC:2.4.2.7]
TRINITY_DN49436_c0_g1	K11088|4e-81|vvi:100250427|SNRPD3, SMD3;SNRPD3, SMD3|hypothetical protein LOC100250427; K11088 small nuclear ribonucleoprotein D3
TRINITY_DN49449_c1_g1	K20547|3e-55|vvi:100266184|CHIB;EC:3.2.1.14|hypothetical protein LOC100266184
TRINITY_DN49482_c1_g3	K00012|1e-11|zma:100279549|UGDH, ugd;EC:1.1.1.22|TIDP3299; LOC100279549; K00012 UDPglucose 6-dehydrogenase [EC:1.1.1.22]
TRINITY_DN49497_c0_g1	K14431|0.0|rcu:RCOM_0353720|TGA;TGA|Transcription factor HBP-1b(c1), putative; K14431 transcription factor TGA
TRINITY_DN49554_c0_g1	K09422|2e-24|vvi:100244605|--|hypothetical protein LOC100244605; K09422 myb proto-oncogene protein, plant
TRINITY_DN49577_c0_g1	K00660|5e-40|vvi:100263443|CHS;EC:2.3.1.74|CHS; chalcone synthase; K00660 chalcone synthase [EC:2.3.1.74]
TRINITY_DN49577_c2_g2	K00660|9e-61|pop:POPTR_579292|CHS;EC:2.3.1.74|CHS7; chalcone synthase (EC:2.3.1.74); K00660 chalcone synthase [EC:2.3.1.74]
TRINITY_DN49610_c0_g2	K02991|6e-07|vvi:100257717|RP-S6e, RPS6;RP-S6e, RPS6|hypothetical protein LOC100257717
TRINITY_DN49627_c0_g1	K02608|1e-127|vvi:100248173|ORC6;ORC6|hypothetical protein LOC100248173; K02608 origin recognition complex subunit 6
TRINITY_DN49680_c1_g3	K01530|1e-112|osa:4341328|--|Os06g0565900; K01530 phospholipid-translocating ATPase [EC:3.6.3.1]
TRINITY_DN49687_c1_g1	K11279|1e-11|vvi:100267878|--|hypothetical protein LOC100267878; K11279 nucleosome assembly protein 1-like 1
TRINITY_DN49691_c2_g1	K02889|4e-45|rcu:RCOM_0042160|RP-L21e, RPL21;RP-L21e, RPL21|60S ribosomal protein L21, putative; K02889 large subunit ribosomal protein L21e
TRINITY_DN49885_c2_g2	K00660|0.0|vvi:100258106|CHS;EC:2.3.1.74|CHS3; chalcone synthase
TRINITY_DN49885_c2_g3	K00660|1e-120|vvi:100258106|CHS;EC:2.3.1.74|CHS3; chalcone synthase
TRINITY_DN50156_c0_g1	K14332|6e-26|ath:AT1G08380|psaO;psaO|PSAO; PSAO (photosystem I subunit O); K14332 photosystem I subunit PsaO
TRINITY_DN50192_c0_g1	K14506|1e-140|vvi:100251627|JAR1;JAR1|hypothetical protein LOC100251627; K14506 jasmonic acid-amino synthetase
TRINITY_DN50204_c0_g1	K02295|6e-32|vvi:100256713|CRY;CRY|hypothetical protein LOC100256713; K02295 cryptochrome
TRINITY_DN50324_c0_g1	K00889|0.0|vvi:100258261|PIP5K;EC:2.7.1.68|hypothetical protein LOC100258261; K00889 1-phosphatidylinositol-4-phosphate 5-kinase [EC:2.7.1.68]
TRINITY_DN50325_c0_g1	K01193|1e-109|vvi:100241232|INV, sacA;EC:3.2.1.26|similar to vacuolar invertase 2, GIN2; K01193 beta-fructofuranosidase [EC:3.2.1.26]
TRINITY_DN50349_c2_g3	K00889|0.0|rcu:RCOM_0502210|PIP5K;EC:2.7.1.68|phosphatidylinositol-4-phosphate 5-kinase, putative (EC:2.7.1.68); K00889 1-phosphatidylinositol-4-phosphate 5-kinase [EC:2.7.1.68]
TRINITY_DN50379_c2_g3	K09422|1e-156|vvi:100240910|--|hypothetical protein LOC100240910; K09422 myb proto-oncogene protein, plant
TRINITY_DN50574_c0_g1	K00799|9e-19|pop:POPTR_817349|GST, gst;EC:2.5.1.18|hypothetical protein; K00799 glutathione S-transferase [EC:2.5.1.18]
TRINITY_DN50575_c1_g2	K14484|3e-34|vvi:100259648|IAA;IAA|hypothetical protein LOC100259648
TRINITY_DN50687_c2_g1	K09286|2e-08|vvi:100248027|--|hypothetical protein LOC100248027; K09286 EREBP-like factor
TRINITY_DN50718_c0_g5	K01188|4e-19|osa:4340890|E3.2.1.21;EC:3.2.1.21|Os06g0320200
TRINITY_DN50754_c0_g3	K12639|0.0|vvi:100257922|CYP724B1, D11;EC:1.14.13.-|hypothetical protein LOC100257922; K12639 cytochrome P450, family 724, subfamily B, polypeptide 1 [EC:1.14.13.-]
TRINITY_DN50797_c3_g1	K00469|1e-168|pop:POPTR_418574|MIOX;EC:1.13.99.1|hypothetical protein; K00469 inositol oxygenase [EC:1.13.99.1]
TRINITY_DN50814_c1_g1	K08054|1e-51|rcu:RCOM_1503060|CANX;CANX|calnexin, putative; K08054 calnexin
TRINITY_DN50838_c0_g1	K02873|1e-14|rcu:RCOM_1318700|RP-L13e, RPL13;RP-L13e, RPL13|60S ribosomal protein L13, putative; K02873 large subunit ribosomal protein L13e
TRINITY_DN50922_c2_g1	K13065|1e-89|rcu:RCOM_1442250|E2.3.1.133, HCT;EC:2.3.1.133|Anthranilate N-benzoyltransferase protein, putative (EC:2.3.1.144); K13065 shikimate O-hydroxycinnamoyltransferase [EC:2.3.1.133]
TRINITY_DN50938_c0_g2	K01520|3e-54|ath:AT3G46940|dut, DUT;EC:3.6.1.23|deoxyuridine 5'-triphosphate nucleotidohydrolase family (EC:3.6.1.23); K01520 dUTP pyrophosphatase [EC:3.6.1.23]
TRINITY_DN50938_c0_g5	K01520|1e-88|ath:AT3G46940|dut, DUT;EC:3.6.1.23|deoxyuridine 5'-triphosphate nucleotidohydrolase family (EC:3.6.1.23); K01520 dUTP pyrophosphatase [EC:3.6.1.23]
TRINITY_DN50943_c0_g3	K09285|1e-45|vvi:100252316|--|hypothetical protein LOC100252316; K09285 AP2-like factor, ANT lineage
TRINITY_DN51012_c0_g1	K02212|0.0|vvi:100262415|MCM4, CDC54;EC:3.6.4.12|hypothetical protein LOC100262415; K02212 minichromosome maintenance protein 4 (cell division control protein 54)
TRINITY_DN51029_c1_g1	K08235|5e-29|vvi:100248328|--|hypothetical protein LOC100248328; K08235 xyloglucan:xyloglucosyl transferase [EC:2.4.1.207]
TRINITY_DN51249_c2_g2	K00799|3e-12|vvi:100232976|GST, gst;EC:2.5.1.18|GST4; glutathione S-transferase; K00799 glutathione S-transferase [EC:2.5.1.18]
TRINITY_DN51411_c0_g1	K20547|1e-104|vvi:100266184|CHIB;EC:3.2.1.14|hypothetical protein LOC100266184
TRINITY_DN51453_c1_g2	K09422|1e-92|pop:POPTR_564352|--|MYB212; hypothetical protein; K09422 myb proto-oncogene protein, plant
TRINITY_DN51472_c0_g2	K09422|5e-23|osa:4347052|--|Os09g0414300; K09422 myb proto-oncogene protein, plant
TRINITY_DN51545_c0_g1	K01051|1e-152|vvi:100242515|E3.1.1.11;EC:3.1.1.11|hypothetical protein LOC100242515
TRINITY_DN51551_c1_g1	K21026|1e-150|vvi:100252867|AAE;EC:3.1.1.80|hypothetical protein LOC100252867
TRINITY_DN51753_c1_g1	K12127|1e-132|vvi:100258790|TOC1, APRR1;TOC1, APRR1|hypothetical protein LOC100258790
TRINITY_DN51770_c2_g1	K05953|1e-152|pop:POPTR_581960|--|hypothetical protein; K05953 nicotianamine synthase [EC:2.5.1.43]
TRINITY_DN51815_c0_g2	K01728|1e-43|rcu:RCOM_0697960|pel;EC:4.2.2.2|Pectate lyase precursor, putative (EC:4.2.2.2); K01728 pectate lyase [EC:4.2.2.2]
TRINITY_DN51815_c0_g3	K01728|1e-128|pop:POPTR_575272|pel;EC:4.2.2.2|hypothetical protein; K01728 pectate lyase [EC:4.2.2.2]
TRINITY_DN51824_c0_g2	K01179|1e-148|vvi:100257079|E3.2.1.4;EC:3.2.1.4|hypothetical protein LOC100257079
TRINITY_DN51965_c2_g2	K13081|1e-106|vvi:100232982|LAR;EC:1.17.1.3|LAR1; leucoanthocyanidin reductase 1; K13081 leucoanthocyanidin reductase [EC:1.17.1.3]
TRINITY_DN52089_c1_g4	K13993|2e-93|rcu:RCOM_0450640|HSP20;HSP20|heat-shock protein, putative; K13993 HSP20 family protein
TRINITY_DN52104_c0_g5	K01535|9e-92|vvi:100254244|PMA1, PMA2;EC:3.6.3.6|hypothetical protein LOC100254244; K01535 H+-transporting ATPase [EC:3.6.3.6]
TRINITY_DN52110_c6_g1	K05349|1e-13|ath:AT3G47010|bglX;EC:3.2.1.21|hydrolase, hydrolyzing O-glycosyl compounds
TRINITY_DN52110_c6_g2	K05349|7e-48|ath:AT3G47040|bglX;EC:3.2.1.21|glycosyl hydrolase family 3 protein
TRINITY_DN52411_c2_g1	K09487|5e-30|pop:POPTR_818818|HSP90B, TRA1;HSP90B, TRA1|hypothetical protein; K09487 heat shock protein 90kDa beta
TRINITY_DN52490_c0_g3	K14498|2e-66|pop:POPTR_801108|SNRK2;EC:2.7.11.1|hypothetical protein; K14498 serine/threonine-protein kinase SRK2 [EC:2.7.11.1]
TRINITY_DN52509_c0_g1	K08486|1e-81|vvi:100241360|STX1B_2_3;STX1B_2_3|hypothetical protein LOC100241360
TRINITY_DN52562_c2_g1	K02695|1e-75|pop:POPTR_712066|psaH;psaH|photosystem I reaction centre subunit VI (H) (PSAH); K02695 photosystem I subunit VI
TRINITY_DN52603_c0_g1	K13066|3e-60|vvi:100260786|E2.1.1.68, COMT;EC:2.1.1.68|hypothetical protein LOC100260786
TRINITY_DN52619_c1_g2	K11251|3e-36|vvi:100257319|H2A;H2A|hypothetical protein LOC100257319; K11251 histone H2A
TRINITY_DN52619_c2_g3	K11251|4e-55|pop:POPTR_571462|H2A;H2A|HTA903; histone 2; K11251 histone H2A
TRINITY_DN52639_c1_g1	K13448|2e-87|pop:POPTR_412211|CML;CML|hypothetical protein; K13448 calcium-binding protein CML
TRINITY_DN52704_c0_g4	K09510|8e-33|rcu:RCOM_1673240|--|Protein SIS1, putative; K09510 DnaJ homolog subfamily B member 4
TRINITY_DN52725_c1_g1	K02941|1e-125|pop:POPTR_832583|RP-LP0, RPLP0;RP-LP0, RPLP0|hypothetical protein; K02941 large subunit ribosomal protein LP0
TRINITY_DN52802_c0_g2	K14492|5e-24|vvi:100243627|ARR-A;ARR-A|hypothetical protein LOC100243627; K14492 two-component response regulator ARR-A family
TRINITY_DN52810_c2_g1	K13993|2e-77|vvi:100267696|HSP20;HSP20|hypothetical protein LOC100267696; K13993 HSP20 family protein
TRINITY_DN52817_c0_g3	K02213|6e-51|rcu:RCOM_0611750|CDC6;CDC6|cdc6, putative; K02213 cell division control protein 6
TRINITY_DN52948_c1_g1	K06670|0.0|vvi:100256351|SCC1, MCD1, RAD21;SCC1, MCD1, RAD21|hypothetical protein LOC100256351; K06670 cohesin complex subunit SCC1
TRINITY_DN53073_c1_g2	K11778|1e-130|pop:POPTR_863254|DHDDS, RER2, SRT1;EC:2.5.1.87|hypothetical protein; K11778 cis-prenyltransferase, dehydrodolichyl diphosphate synthase [EC:2.5.1.-]
TRINITY_DN53103_c5_g1	K13495|0.0|vvi:100262460|CISZOG;EC:2.4.1.215|hypothetical protein LOC100262460; K13495 cis-zeatin O-glucosyltransferase [EC:2.4.1.215]
TRINITY_DN53121_c1_g2	K08237|0.0|pop:POPTR_731288|--|hypothetical protein; K08237 hydroquinone glucosyltransferase [EC:2.4.1.218]
TRINITY_DN53257_c2_g2	K11253|3e-88|zma:100192589|H3;H3|H3C4, H3C2, H3C3; Histone H3.2; K11253 histone H3
TRINITY_DN53336_c0_g1	K09843|0.0|vvi:100245540|E1.14.13.93;EC:1.14.13.93|hypothetical protein LOC100245540; K09843 (+)-abscisic acid 8'-hydroxylase [EC:1.14.13.93]
TRINITY_DN53349_c0_g3	K02209|0.0|vvi:100261877|MCM5, CDC46;EC:3.6.4.12|hypothetical protein LOC100261877; K02209 minichromosome maintenance protein 5 (cell division control protein 46)
TRINITY_DN53367_c0_g1	K03283|1e-170|rcu:RCOM_0464250|HSPA1_8;HSPA1_8|heat shock protein, putative (EC:1.3.1.74); K03283 heat shock 70kDa protein 1/8
TRINITY_DN53405_c0_g1	K14379|7e-45|vvi:100261163|ACP5;EC:3.1.3.2|hypothetical protein LOC100261163
TRINITY_DN53405_c0_g4	K14379|2e-39|zma:100272649|ACP5;EC:3.1.3.2|pco103710; LOC100272649
TRINITY_DN53552_c0_g1	K14488|2e-36|pop:POPTR_556560|SAUR;SAUR|SAUR82; SAUR family protein; K14488 SAUR family protein
TRINITY_DN53552_c0_g2	K14488|3e-32|pop:POPTR_800822|SAUR;SAUR|SAUR73; SAUR family protein; K14488 SAUR family protein
TRINITY_DN53609_c7_g2	K09646|1e-25|rcu:RCOM_0476130|--|retinoid-inducible serine carboxypeptidase, putative (EC:3.4.16.6); K09646 serine carboxypeptidase 1 [EC:3.4.16.-]
TRINITY_DN53621_c6_g1	K09422|1e-130|vvi:100262671|--|hypothetical protein LOC100262671; K09422 myb proto-oncogene protein, plant
TRINITY_DN53641_c0_g1	K01213|2e-74|vvi:100253785|E3.2.1.67;EC:3.2.1.67|hypothetical protein LOC100253785; K01213 galacturan 1,4-alpha-galacturonidase [EC:3.2.1.67]
TRINITY_DN53719_c0_g1	K11253|2e-90|zma:100192589|H3;H3|H3C4, H3C2, H3C3; Histone H3.2; K11253 histone H3
TRINITY_DN53719_c0_g4	K11253|7e-90|zma:100192589|H3;H3|H3C4, H3C2, H3C3; Histone H3.2; K11253 histone H3
TRINITY_DN53722_c2_g2	K02607|0.0|vvi:100243867|ORC5;ORC5|hypothetical protein LOC100243867; K02607 origin recognition complex subunit 5
TRINITY_DN53735_c0_g1	K18857|3e-67|vvi:100232853|ADH1;EC:1.1.1.1|ADH1, GV-ADH1; alcohol dehydrogenase 1; K00001 alcohol dehydrogenase [EC:1.1.1.1]
TRINITY_DN53752_c1_g2	K03955|9e-52|rcu:RCOM_0860860|NDUFAB1;NDUFAB1|acyl carrier protein, putative; K03955 NADH dehydrogenase (ubiquinone) 1 alpha/beta subcomplex 1 [EC:1.6.5.3 1.6.99.3]
TRINITY_DN53761_c1_g1	K05359|6e-35|ppp:PHYPADRAFT_128069|ADT, PDT;EC:4.2.1.91 4.2.1.51|hypothetical protein
TRINITY_DN53920_c4_g1	K13448|2e-80|vvi:100254364|CML;CML|hypothetical protein LOC100254364; K13448 calcium-binding protein CML
TRINITY_DN53939_c0_g1	K00830|0.0|pop:POPTR_815301|AGXT;EC:2.6.1.44 2.6.1.45 2.6.1.51|serine--glyoxylate transaminase (EC:2.6.1.45); K00830 alanine-glyoxylate transaminase / serine-glyoxylate transaminase / serine-pyruvate transaminase [EC:2.6.1.44 2.6.1.45 2.6.1.51]
TRINITY_DN53989_c1_g2	K01728|4e-83|rcu:RCOM_0697960|pel;EC:4.2.2.2|Pectate lyase precursor, putative (EC:4.2.2.2); K01728 pectate lyase [EC:4.2.2.2]
TRINITY_DN54183_c5_g1	K00083|3e-19|vvi:100257308|E1.1.1.195;EC:1.1.1.195|hypothetical protein LOC100257308; K00083 cinnamyl-alcohol dehydrogenase [EC:1.1.1.195]
TRINITY_DN54183_c6_g2	K00083|4e-69|vvi:100257308|E1.1.1.195;EC:1.1.1.195|hypothetical protein LOC100257308; K00083 cinnamyl-alcohol dehydrogenase [EC:1.1.1.195]
TRINITY_DN54183_c6_g3	K00083|2e-14|vvi:100257308|E1.1.1.195;EC:1.1.1.195|hypothetical protein LOC100257308; K00083 cinnamyl-alcohol dehydrogenase [EC:1.1.1.195]
TRINITY_DN54305_c2_g1	K14489|0.0|vvi:100254304|AHK2_3_4;EC:2.7.13.3|similar to cytokinin receptor 1; K14489 arabidopsis histidine kinase 2/3/4 (cytokinin receptor) [EC:2.7.13.3]
TRINITY_DN54441_c0_g2	K09285|0.0|vvi:100256589|--|hypothetical protein LOC100256589; K09285 AP2-like factor, ANT lineage
TRINITY_DN54587_c2_g3	K12858|1e-25|vvi:100263263|DDX23, PRP28;EC:3.6.4.13|hypothetical protein LOC100263263; K12858 ATP-dependent RNA helicase DDX23/PRP28 [EC:3.6.4.13]
TRINITY_DN54608_c3_g1	K01637|0.0|vvi:100248231|E4.1.3.1, aceA;EC:4.1.3.1|similar to Isocitrate lyase; K01637 isocitrate lyase [EC:4.1.3.1]
TRINITY_DN54678_c0_g1	K07407|0.0|rcu:RCOM_1454590|E3.2.1.22B, galA, rafA;EC:3.2.1.22|alpha-galactosidase/alpha-n-acetylgalactosaminidase, putative (EC:3.2.1.22); K07407 alpha-galactosidase [EC:3.2.1.22]
TRINITY_DN54732_c1_g2	K08914|1e-26|pop:POPTR_814251|LHCB3;LHCB3|Lhcb3-2; light-harvesting complex II protein Lhcb3; K08914 light-harvesting complex II chlorophyll a/b binding protein 3
TRINITY_DN54764_c1_g1	K11159|1e-52|vvi:100249903|--|hypothetical protein LOC100249903; K11159 carotenoid cleavage dioxygenase
TRINITY_DN54770_c2_g2	K01611|2e-58|pop:POPTR_566714|speD, AMD1;EC:4.1.1.50|S-adenosylmethionine decarboxylase (EC:4.1.1.50); K01611 S-adenosylmethionine decarboxylase [EC:4.1.1.50]
TRINITY_DN54770_c2_g4	K01611|2e-68|vvi:100265287|speD, AMD1;EC:4.1.1.50|SAMDC; S-adenosyl-L-methionine decarboxylase; K01611 S-adenosylmethionine decarboxylase [EC:4.1.1.50]
TRINITY_DN54806_c0_g1	K08730|4e-09|vvi:100266447|PTDSS2;EC:2.7.8.29|hypothetical protein LOC100266447; K08730 phosphatidylserine synthase 2 [EC:2.7.8.-]
TRINITY_DN54829_c4_g2	K05359|1e-110|vvi:100267022|ADT, PDT;EC:4.2.1.91 4.2.1.51|hypothetical protein
TRINITY_DN54831_c1_g2	K02987|1e-10|vvi:100244922|RP-S4e, RPS4;RP-S4e, RPS4|similar to 40S ribosomal S4 protein; K02987 small subunit ribosomal protein S4e
TRINITY_DN54872_c2_g1	K07052|0.0|vvi:100249222|--|hypothetical protein LOC100249222; K07052
TRINITY_DN54890_c0_g5	K13429|5e-72|vvi:100255092|CERK1;CERK1|hypothetical protein LOC100255092; K13429 chitin elicitor receptor kinase 1
TRINITY_DN54960_c2_g1	K03363|0.0|vvi:100250079|CDC20;CDC20|hypothetical protein LOC100250079; K03363 cell division cycle 20, cofactor of APC complex
TRINITY_DN54960_c2_g5	K03363|0.0|vvi:100250079|CDC20;CDC20|hypothetical protein LOC100250079; K03363 cell division cycle 20, cofactor of APC complex
TRINITY_DN54995_c1_g1	K08235|2e-76|pop:POPTR_768438|--|hypothetical protein; K08235 xyloglucan:xyloglucosyl transferase [EC:2.4.1.207]
TRINITY_DN55002_c1_g2	K14567|2e-40|vvi:100267476|UTP14;UTP14|hypothetical protein LOC100267476; K14567 U3 small nucleolar RNA-associated protein 14
TRINITY_DN55089_c0_g1	K01188|1e-145|vvi:100254458|E3.2.1.21;EC:3.2.1.21|hypothetical protein LOC100254458
TRINITY_DN55159_c0_g2	K08850|0.0|vvi:100268070|--|hypothetical protein LOC100268070; K08850 aurora kinase, other [EC:2.7.11.1]
TRINITY_DN55217_c0_g1	K01188|0.0|vvi:100246224|E3.2.1.21;EC:3.2.1.21|hypothetical protein LOC100246224
TRINITY_DN55272_c0_g1	K13679|0.0|vvi:100264969|WAXY;EC:2.4.1.242|similar to granule-bound starch synthase; K13679 granule-bound starch synthase [EC:2.4.1.242]
TRINITY_DN55272_c0_g2	K02942|2e-32|rcu:RCOM_0969300|RP-LP1, RPLP1;RP-LP1, RPLP1|60S acidic ribosomal protein P1, putative; K02942 large subunit ribosomal protein LP1
TRINITY_DN55307_c0_g6	K03283|1e-86|vvi:100259551|HSPA1_8;HSPA1_8|similar to HSC70-1 (heat shock cognate 70 kDa protein 1); ATP binding; K03283 heat shock 70kDa protein 1/8
TRINITY_DN55314_c0_g3	K13448|2e-77|rcu:RCOM_0126810|CML;CML|calcium binding protein/cast, putative; K13448 calcium-binding protein CML
TRINITY_DN55328_c0_g3	K12116|1e-119|vvi:100255972|FKF1;FKF1|hypothetical protein LOC100255972
TRINITY_DN55422_c0_g2	K00430|1e-170|rcu:RCOM_0774200|E1.11.1.7;EC:1.11.1.7|Peroxidase 10 precursor, putative (EC:1.11.1.7); K00430 peroxidase [EC:1.11.1.7]
TRINITY_DN55438_c1_g2	K01568|8e-92|rcu:RCOM_0489390|PDC, pdc;EC:4.1.1.1|pyruvate decarboxylase, putative (EC:4.1.1.1); K01568 pyruvate decarboxylase [EC:4.1.1.1]
TRINITY_DN55469_c2_g4	K02868|2e-58|rcu:RCOM_1594400|RP-L11e, RPL11;RP-L11e, RPL11|60S ribosomal protein L11, putative; K02868 large subunit ribosomal protein L11e
TRINITY_DN55480_c1_g3	K15813|5e-88|vvi:100259856|LUP4;EC:5.4.99.39|hypothetical protein LOC100259856
TRINITY_DN55543_c1_g1	K08242|2e-09|pop:POPTR_815989|E2.1.1.143;EC:2.1.1.143|hypothetical protein; K08242 24-methylenesterol C-methyltransferase [EC:2.1.1.143]
TRINITY_DN55664_c1_g1	K04078|1e-37|vvi:100264459|--|hypothetical protein LOC100264459; K04078 chaperonin GroES
TRINITY_DN55710_c1_g1	K02324|1e-69|rcu:RCOM_0792580|POLE1;EC:2.7.7.7|DNA polymerase epsilon, catalytic subunit, putative (EC:2.7.7.7); K02324 DNA polymerase epsilon subunit 1 [EC:2.7.7.7]
TRINITY_DN55710_c1_g2	K02324|2e-38|pop:POPTR_594813|POLE1;EC:2.7.7.7|hypothetical protein; K02324 DNA polymerase epsilon subunit 1 [EC:2.7.7.7]
TRINITY_DN55760_c1_g1	K01183|1e-107|vvi:100232985|E3.2.1.14;EC:3.2.1.14|CHIT1B, chit1a, chitinase; chitinase class I
TRINITY_DN55777_c1_g2	K00799|6e-47|vvi:100245065|GST, gst;EC:2.5.1.18|hypothetical protein LOC100245065
TRINITY_DN55862_c1_g1	K05868|0.0|rcu:RCOM_1601010|CCNB1;CCNB1|cyclin B, putative; K05868 cyclin B
TRINITY_DN55976_c6_g1	K04371|0.0|vvi:100251947|MAPK1_3;EC:2.7.11.24|hypothetical protein LOC100251947; K04371 extracellular signal-regulated kinase 1/2 [EC:2.7.11.24]
TRINITY_DN56024_c0_g1	K00021|1e-43|vvi:100265082|HMGCR;EC:1.1.1.34|hypothetical protein LOC100265082; K00021 hydroxymethylglutaryl-CoA reductase (NADPH) [EC:1.1.1.34]
TRINITY_DN56024_c0_g2	K00021|2e-98|vvi:100245191|HMGCR;EC:1.1.1.34|hypothetical protein LOC100245191; K00021 hydroxymethylglutaryl-CoA reductase (NADPH) [EC:1.1.1.34]
TRINITY_DN56032_c2_g1	K04733|0.0|rcu:RCOM_1720970|IRAK4;EC:2.7.11.1|receptor serine-threonine protein kinase, putative (EC:2.7.10.2); K04733 interleukin-1 receptor-associated kinase 4 [EC:2.7.11.1]
TRINITY_DN56053_c0_g1	K01728|9e-62|rcu:RCOM_1083020|pel;EC:4.2.2.2|Pectate lyase precursor, putative (EC:4.2.2.2); K01728 pectate lyase [EC:4.2.2.2]
TRINITY_DN56053_c3_g1	K01728|1e-166|pop:POPTR_547984|pel;EC:4.2.2.2|hypothetical protein; K01728 pectate lyase [EC:4.2.2.2]
TRINITY_DN56053_c3_g2	K01728|2e-41|vvi:100232902|pel;EC:4.2.2.2|PL1; pectate lyase PL1-like; K01728 pectate lyase [EC:4.2.2.2]
TRINITY_DN56076_c2_g2	K01535|1e-153|vvi:100267065|PMA1, PMA2;EC:3.6.3.6|hypothetical protein LOC100267065; K01535 H+-transporting ATPase [EC:3.6.3.6]
TRINITY_DN56094_c2_g1	K02542|0.0|pop:POPTR_797236|MCM6;EC:3.6.4.12|hypothetical protein; K02542 minichromosome maintenance protein 6
TRINITY_DN56227_c0_g1	K17991|4e-33|vvi:100264814|PXG;EC:1.11.2.3|hypothetical protein LOC100264814
TRINITY_DN56250_c0_g2	K11254|9e-48|ppp:PHYPADRAFT_152862|H4;H4|HFO1503; histone H4; K11254 histone H4
TRINITY_DN56250_c0_g3	K11254|1e-66|ppp:PHYPADRAFT_152862|H4;H4|HFO1503; histone H4; K11254 histone H4
TRINITY_DN56421_c2_g1	K09422|1e-102|pop:POPTR_571286|--|MYB052; hypothetical protein; K09422 myb proto-oncogene protein, plant
TRINITY_DN56477_c4_g1	K13447|6e-06|rcu:RCOM_1502990|RBOH;EC:1.6.3.- 1.11.1.-|respiratory burst oxidase, putative (EC:1.6.3.1); K13447 respiratory burst oxidase [EC:1.6.3.- 1.11.1.-]
TRINITY_DN56538_c1_g1	K02885|4e-11|rcu:RCOM_1179520|RP-L19e, RPL19;RP-L19e, RPL19|60S ribosomal protein L19, putative; K02885 large subunit ribosomal protein L19e
TRINITY_DN56588_c1_g3	K14505|1e-175|vvi:100264093|CYCD3;CYCD3|hypothetical protein LOC100264093; K14505 cyclin D3, plant
TRINITY_DN56633_c0_g1	K08908|0.0|vvi:100268126|LHCA2;LHCA2|hypothetical protein LOC100268126
TRINITY_DN56706_c2_g2	K10775|0.0|vvi:100245997|PAL;EC:4.3.1.24|hypothetical protein LOC100245997; K10775 phenylalanine ammonia-lyase [EC:4.3.1.24]
TRINITY_DN56767_c0_g3	K00083|1e-29|vvi:100257308|E1.1.1.195;EC:1.1.1.195|hypothetical protein LOC100257308; K00083 cinnamyl-alcohol dehydrogenase [EC:1.1.1.195]
TRINITY_DN56794_c0_g1	K20547|3e-88|vvi:100266184|CHIB;EC:3.2.1.14|hypothetical protein LOC100266184
TRINITY_DN56851_c0_g1	K18592|1e-122|vvi:100247429|GGT1_5, CD224;EC:2.3.2.2 3.4.19.13 3.4.19.14|hypothetical protein LOC100247429; K00681 gamma-glutamyltranspeptidase [EC:2.3.2.2]
TRINITY_DN56917_c1_g1	K13289|1e-163|vvi:100265560|CTSA, CPY;EC:3.4.16.5|hypothetical protein LOC100265560; K13289 cathepsin A (carboxypeptidase C) [EC:3.4.16.5]
TRINITY_DN57019_c0_g2	K07374|2e-64|vvi:100247366|TUBA;TUBA|hypothetical protein LOC100247366; K07374 tubulin alpha
TRINITY_DN57019_c1_g1	K07374|3e-69|ppp:PHYPADRAFT_29741|TUBA;TUBA|hypothetical protein
TRINITY_DN57019_c1_g2	K07374|1e-122|vvi:100256600|TUBA;TUBA|hypothetical protein LOC100256600
TRINITY_DN57101_c2_g1	K13993|3e-88|pop:POPTR_769024|HSP20;HSP20|hypothetical protein; K13993 HSP20 family protein
TRINITY_DN57360_c2_g1	K02925|4e-59|vvi:100267716|RP-L3e, RPL3;RP-L3e, RPL3|hypothetical protein LOC100267716
TRINITY_DN57426_c1_g2	K09285|1e-151|vvi:100252316|--|hypothetical protein LOC100252316; K09285 AP2-like factor, ANT lineage
TRINITY_DN57449_c3_g1	K10781|2e-07|osa:4340093|FATB;EC:3.1.2.14 3.1.2.21|Os06g0143400; K10781 fatty acyl-ACP thioesterase B [EC:3.1.2.14 3.1.2.-]
TRINITY_DN57588_c0_g2	K13412|0.0|rcu:RCOM_1479000|CPK;EC:2.7.11.1|calcium-dependent protein kinase, putative (EC:2.7.11.17); K13412 calcium-dependent protein kinase [EC:2.7.11.1]
TRINITY_DN57820_c0_g2	K03094|2e-63|rcu:RCOM_1598820|SKP1, CBF3D;SKP1, CBF3D|skp1, putative; K03094 S-phase kinase-associated protein 1
TRINITY_DN57827_c0_g5	K07375|6e-74|osa:4331315|TUBB;TUBB|Os03g0105600; K07375 tubulin beta
TRINITY_DN57914_c3_g2	K22013|9e-26|vvi:100265112|SGR, SGRL;EC:4.99.1.10|hypothetical protein LOC100265112
TRINITY_DN57982_c2_g2	K20547|2e-71|vvi:100266184|CHIB;EC:3.2.1.14|hypothetical protein LOC100266184
TRINITY_DN57982_c2_g3	K01183|5e-66|vvi:100233089|E3.2.1.14;EC:3.2.1.14|CHI1B; class I extracellular chitinase
TRINITY_DN57982_c2_g4	K01183|3e-18|vvi:100233089|E3.2.1.14;EC:3.2.1.14|CHI1B; class I extracellular chitinase
TRINITY_DN58089_c1_g1	K02210|0.0|vvi:100267599|MCM7, CDC47;EC:3.6.4.12|hypothetical protein LOC100267599; K02210 minichromosome maintenance protein 7 (cell division control protein 47)
TRINITY_DN58099_c4_g2	K05359|2e-89|vvi:100267022|ADT, PDT;EC:4.2.1.91 4.2.1.51|hypothetical protein
TRINITY_DN58131_c0_g1	K01285|0.0|vvi:100243061|PRCP;EC:3.4.16.2|hypothetical protein LOC100243061; K01285 lysosomal Pro-X carboxypeptidase [EC:3.4.16.2]
TRINITY_DN58134_c0_g1	K13083|0.0|vvi:100261319|CYP75A;EC:1.14.13.88|F3'5'H; flavonoid 3'5' hydroxylase; K13083 cytochrome P450, family 75, subfamily A (flavonoid 3',5'-hydroxylase) [EC:1.14.13.88]
TRINITY_DN58383_c0_g1	K14488|5e-41|vvi:100258859|SAUR;SAUR|hypothetical protein LOC100258859; K14488 SAUR family protein
TRINITY_DN58392_c0_g2	K00799|1e-113|vvi:100245065|GST, gst;EC:2.5.1.18|hypothetical protein LOC100245065
TRINITY_DN58435_c0_g1	K01110|0.0|pop:POPTR_259295|PTEN;EC:3.1.3.16 3.1.3.48 3.1.3.67|hypothetical protein; K01110 phosphatidylinositol-3,4,5-trisphosphate 3-phosphatase [EC:3.1.3.67]
TRINITY_DN58522_c1_g1	K01904|0.0|vvi:100245991|4CL;EC:6.2.1.12|4CL; 4-coumarate:CoA ligase; K01904 4-coumarate--CoA ligase [EC:6.2.1.12]
TRINITY_DN58525_c1_g1	K00696|0.0|rcu:RCOM_0271410|E2.4.1.14;EC:2.4.1.14|sucrose phosphate syntase, putative (EC:2.4.1.14); K00696 sucrose-phosphate synthase [EC:2.4.1.14]
TRINITY_DN58588_c3_g1	K00759|8e-18|rcu:RCOM_0923600|APRT, apt;EC:2.4.2.7|Adenine phosphoribosyltransferase, putative (EC:2.4.2.7); K00759 adenine phosphoribosyltransferase [EC:2.4.2.7]
TRINITY_DN58588_c3_g3	K00759|2e-13|osa:4343246|APRT, apt;EC:2.4.2.7|Os07g0484800; K00759 adenine phosphoribosyltransferase [EC:2.4.2.7]
TRINITY_DN58625_c0_g2	K13464|0.0|vvi:100260039|JAZ;JAZ|hypothetical protein LOC100260039
TRINITY_DN58671_c0_g1	K01193|0.0|vvi:100256970|INV, sacA;EC:3.2.1.26|hypothetical protein LOC100256970
TRINITY_DN58688_c4_g1	K01188|9e-41|vvi:100260409|E3.2.1.21;EC:3.2.1.21|hypothetical protein LOC100260409
TRINITY_DN58749_c0_g7	K04712|0.0|pop:POPTR_580886|DEGS;EC:1.14.19.17 1.14.18.5|sphingolipid delta-4 desaturase; K04712 sphingolipid delta-4 desaturase [EC:1.14.-.-]
TRINITY_DN58917_c0_g1	K00876|1e-159|vvi:100257633|udk, UCK;EC:2.7.1.48|hypothetical protein LOC100257633; K00876 uridine kinase [EC:2.7.1.48]
TRINITY_DN58936_c3_g1	K09422|4e-46|vvi:100240800|--|hypothetical protein LOC100240800; K09422 myb proto-oncogene protein, plant
TRINITY_DN59015_c3_g2	K09422|3e-76|pop:POPTR_566874|--|MYB036; hypothetical protein; K09422 myb proto-oncogene protein, plant
TRINITY_DN59055_c0_g1	K10683|1e-162|rcu:RCOM_0543260|BARD1;BARD1|brca1 associated ring domain, putative; K10683 BRCA1-associated RING domain protein 1 [EC:6.3.2.19]
TRINITY_DN59075_c1_g1	K00514|8e-25|vvi:100245154|ZDS, crtQ;EC:1.3.5.6|hypothetical protein LOC100245154; K00514 zeta-carotene desaturase [EC:1.14.99.30]
TRINITY_DN59075_c1_g2	K00514|0.0|vvi:100245154|ZDS, crtQ;EC:1.3.5.6|hypothetical protein LOC100245154; K00514 zeta-carotene desaturase [EC:1.14.99.30]
TRINITY_DN59131_c0_g2	K00770|0.0|vvi:100243459|E2.4.2.24;EC:2.4.2.24|hypothetical protein LOC100243459; K00770 1,4-beta-D-xylan synthase [EC:2.4.2.24]
TRINITY_DN59175_c2_g1	K09422|3e-80|vvi:100250750|--|hypothetical protein LOC100250750; K09422 myb proto-oncogene protein, plant
TRINITY_DN59295_c0_g2	K14487|1e-167|rcu:RCOM_1154750|GH3;GH3|Indole-3-acetic acid-amido synthetase GH3.3, putative; K14487 auxin responsive GH3 gene family
TRINITY_DN59367_c0_g2	K00679|0.0|vvi:100243077|E2.3.1.158;EC:2.3.1.158|hypothetical protein LOC100243077; K00679 phospholipid:diacylglycerol acyltransferase [EC:2.3.1.158]
TRINITY_DN59367_c0_g4	K00679|1e-127|vvi:100243077|E2.3.1.158;EC:2.3.1.158|hypothetical protein LOC100243077; K00679 phospholipid:diacylglycerol acyltransferase [EC:2.3.1.158]
TRINITY_DN59471_c0_g2	K19355|0.0|vvi:100259912|MAN;EC:3.2.1.78|hypothetical protein LOC100259912
TRINITY_DN59486_c0_g1	K01489|1e-123|pop:POPTR_1080879|cdd, CDA;EC:3.5.4.5|cytidine deaminase (EC:3.5.4.5); K01489 cytidine deaminase [EC:3.5.4.5]
TRINITY_DN59490_c1_g1	K01054|1e-58|vvi:100261504|MGLL;EC:3.1.1.23|hypothetical protein LOC100261504
TRINITY_DN59601_c0_g1	K01809|3e-63|vvi:100263511|manA, MPI;EC:5.3.1.8|hypothetical protein LOC100263511; K01809 mannose-6-phosphate isomerase [EC:5.3.1.8]
TRINITY_DN59640_c3_g1	K13648|0.0|vvi:100244741|GAUT;EC:2.4.1.43|hypothetical protein LOC100244741; K13648 alpha-1,4-galacturonosyltransferase [EC:2.4.1.43]
TRINITY_DN59742_c3_g1	K10403|0.0|vvi:100261269|KIF22;KIF22|hypothetical protein LOC100261269; K10403 kinesin family member 22
TRINITY_DN59797_c0_g1	K14486|0.0|rcu:RCOM_1597120|K14486, ARF;K14486, ARF|Auxin response factor, putative; K14486 auxin response factor
TRINITY_DN60022_c2_g1	K01761|5e-07|pop:POPTR_709036|E4.4.1.11;EC:4.4.1.11|methionine gamma-lyase (EC:4.4.1.11); K01761 methionine-gamma-lyase [EC:4.4.1.11]
TRINITY_DN60022_c3_g2	K01761|1e-135|pop:POPTR_709036|E4.4.1.11;EC:4.4.1.11|methionine gamma-lyase (EC:4.4.1.11); K01761 methionine-gamma-lyase [EC:4.4.1.11]
TRINITY_DN60057_c0_g1	K01728|3e-12|rcu:RCOM_1022270|pel;EC:4.2.2.2|Pectate lyase precursor, putative (EC:4.2.2.2); K01728 pectate lyase [EC:4.2.2.2]
TRINITY_DN60057_c1_g1	K01728|1e-149|vvi:100254377|pel;EC:4.2.2.2|hypothetical protein LOC100254377
TRINITY_DN60076_c2_g1	K04392|1e-134|vvi:100266265|RAC1;RAC1|hypothetical protein; K04392 Ras-related C3 botulinum toxin substrate 1
TRINITY_DN60156_c1_g1	K13356|1e-106|vvi:100259719|FAR;EC:1.2.1.84|hypothetical protein LOC100259719
TRINITY_DN60250_c0_g1	K01115|0.0|vvi:100261019|PLD1_2;EC:3.1.4.4|hypothetical protein LOC100261019
TRINITY_DN60292_c1_g2	K02542|9e-45|pop:POPTR_797236|MCM6;EC:3.6.4.12|hypothetical protein; K02542 minichromosome maintenance protein 6
TRINITY_DN60356_c0_g1	K01728|0.0|rcu:RCOM_0697960|pel;EC:4.2.2.2|Pectate lyase precursor, putative (EC:4.2.2.2); K01728 pectate lyase [EC:4.2.2.2]
TRINITY_DN60431_c0_g1	K01051|0.0|rcu:RCOM_0905530|E3.1.1.11;EC:3.1.1.11|Pectinesterase precursor, putative (EC:3.1.1.11); K01051 pectinesterase [EC:3.1.1.11]
TRINITY_DN60569_c2_g3	K14709|1e-142|pop:POPTR_805363|--|ZIP transporter; K14709 solute carrier family 39 (zinc transporter), member 1/2/3
TRINITY_DN60585_c0_g1	K01006|0.0|vvi:100247690|ppdK;EC:2.7.9.1|hypothetical protein LOC100247690; K01006 pyruvate,orthophosphate dikinase [EC:2.7.9.1]
TRINITY_DN60675_c0_g1	K09840|0.0|vvi:100267016|NCED;EC:1.13.11.51|hypothetical protein LOC100267016; K09840 9-cis-epoxycarotenoid dioxygenase [EC:1.13.11.51]
TRINITY_DN60695_c2_g1	K11268|1e-138|vvi:100249805|--|hypothetical protein LOC100249805; K11268 N-acetyltransferase [EC:2.3.1.-]
TRINITY_DN60704_c1_g4	K05278|1e-69|vvi:100267819|FLS;EC:1.14.11.23|hypothetical protein LOC100267819
TRINITY_DN60705_c1_g1	K11364|9e-57|pop:POPTR_815525|--|hypothetical protein; K11364 SAGA-associated factor 29
TRINITY_DN60765_c4_g1	K04368|1e-156|pop:POPTR_745168|MAP2K1, MEK1;EC:2.7.12.2|hypothetical protein; K04368 mitogen-activated protein kinase kinase 1 [EC:2.7.12.2]
TRINITY_DN60820_c3_g1	K00660|1e-38|vvi:100258106|CHS;EC:2.3.1.74|CHS3; chalcone synthase
TRINITY_DN60820_c3_g2	K00660|1e-145|vvi:100263443|CHS;EC:2.3.1.74|CHS; chalcone synthase; K00660 chalcone synthase [EC:2.3.1.74]
TRINITY_DN60920_c0_g1	K01365|0.0|rcu:RCOM_1507820|CTSL;EC:3.4.22.15|cysteine protease, putative (EC:1.3.1.74); K01365 cathepsin L [EC:3.4.22.15]
TRINITY_DN60990_c2_g3	K13448|3e-07|vvi:100264572|CML;CML|hypothetical protein LOC100264572; K13448 calcium-binding protein CML
TRINITY_DN61147_c3_g1	K09840|1e-151|vvi:100251100|NCED;EC:1.13.11.51|hypothetical protein LOC100251100; K09840 9-cis-epoxycarotenoid dioxygenase [EC:1.13.11.51]
TRINITY_DN61210_c2_g3	K08900|1e-47|pop:POPTR_563200|--|hypothetical protein; K08900 mitochondrial chaperone BCS1
TRINITY_DN61356_c0_g3	K01051|1e-153|vvi:100266527|E3.1.1.11;EC:3.1.1.11|hypothetical protein LOC100266527
TRINITY_DN61485_c1_g2	K14498|4e-99|ath:AT4G33950|SNRK2;EC:2.7.11.1|OST1; OST1 (OPEN STOMATA 1); calcium-dependent protein serine/threonine kinase/ kinase/ protein kinase; K14498 serine/threonine-protein kinase SRK2 [EC:2.7.11.1]
TRINITY_DN61501_c0_g2	K01412|2e-07|vvi:100266273|--|hypothetical protein LOC100266273; K01412 mitochondrial processing peptidase [EC:3.4.24.64]
TRINITY_DN61513_c1_g4	K08235|1e-165|vvi:100267763|--|hypothetical protein LOC100267763; K08235 xyloglucan:xyloglucosyl transferase [EC:2.4.1.207]
TRINITY_DN61542_c0_g2	K07025|7e-98|pop:POPTR_658536|--|hypothetical protein; K07025 putative hydrolase of the HAD superfamily
TRINITY_DN61594_c1_g1	K15397|6e-78|vvi:100240826|KCS;EC:2.3.1.199|hypothetical protein LOC100240826
TRINITY_DN61594_c1_g2	K15397|2e-07|vvi:100251061|KCS;EC:2.3.1.199|hypothetical protein LOC100251061
TRINITY_DN61650_c0_g1	K01673|1e-149|vvi:100249137|cynT, can;EC:4.2.1.1|hypothetical protein LOC100249137; K01673 carbonic anhydrase [EC:4.2.1.1]
TRINITY_DN61654_c2_g2	K02219|3e-53|rcu:RCOM_0475440|CKS1;CKS1|Cyclin-dependent kinases regulatory subunit, putative; K02219 cyclin-dependent kinase regulatory subunit CKS1
TRINITY_DN61703_c6_g3	K14190|1e-85|rcu:RCOM_0278070|VTC2_5;EC:2.7.7.69|hypothetical protein; K14190 GDP-L-galactose phosphorylase [EC:2.7.7.69]
TRINITY_DN61735_c0_g3	K10398|0.0|vvi:100250033|--|similar to kinesin motor protein-related; K10398 kinesin family member 11
TRINITY_DN61775_c2_g1	K13412|0.0|rcu:RCOM_1008260|CPK;EC:2.7.11.1|calcium-dependent protein kinase, putative (EC:2.7.11.17); K13412 calcium-dependent protein kinase [EC:2.7.11.1]
TRINITY_DN61950_c0_g2	K09503|2e-06|pop:POPTR_558228|DNAJA2;DNAJA2|hypothetical protein; K09503 DnaJ homolog subfamily A member 2
TRINITY_DN62047_c0_g3	K16055|0.0|ath:AT2G18700|TPS;EC:2.4.1.15 3.1.3.12|ATTPS11; transferase, transferring glycosyl groups
TRINITY_DN62090_c2_g1	K05868|0.0|rcu:RCOM_0873690|CCNB1;CCNB1|cyclin B, putative; K05868 cyclin B
TRINITY_DN62118_c0_g1	K09422|4e-24|pop:POPTR_776076|--|MYB071; hypothetical protein; K09422 myb proto-oncogene protein, plant
TRINITY_DN62235_c0_g2	K14411|4e-88|rcu:RCOM_0046640|MSI;MSI|Heterogeneous nuclear ribonucleoprotein 27C, putative; K14411 RNA-binding protein Musashi
TRINITY_DN62320_c1_g1	K01193|3e-10|vvi:100256970|INV, sacA;EC:3.2.1.26|hypothetical protein LOC100256970
TRINITY_DN62369_c0_g1	K06678|0.0|vvi:100242435|YCG1, CAPG;YCG1, CAPG|hypothetical protein LOC100242435; K06678 condensin complex subunit 3
TRINITY_DN62378_c2_g1	K12133|1e-57|vvi:100250535|LHY;LHY|hypothetical protein LOC100250535
TRINITY_DN62378_c2_g2	K12133|0.0|vvi:100250535|LHY;LHY|hypothetical protein LOC100250535
TRINITY_DN62417_c0_g5	K06685|1e-131|pop:POPTR_589279|MOB1, Mats;MOB1, Mats|hypothetical protein; K06685 maintenance of ploidy protein MOB1 (MPS1 binder 1)
TRINITY_DN62441_c0_g1	K05868|1e-174|rcu:RCOM_1601010|CCNB1;CCNB1|cyclin B, putative; K05868 cyclin B
TRINITY_DN62449_c0_g2	K00218|1e-118|vvi:100255647|por;EC:1.3.1.33|hypothetical protein LOC100255647; K00218 protochlorophyllide reductase [EC:1.3.1.33]
TRINITY_DN62511_c1_g2	K13648|0.0|vvi:100262181|GAUT;EC:2.4.1.43|hypothetical protein LOC100262181; K13648 alpha-1,4-galacturonosyltransferase [EC:2.4.1.43]
TRINITY_DN62519_c0_g2	K02955|9e-08|ppp:PHYPADRAFT_198161|RP-S14e, RPS14;RP-S14e, RPS14|hypothetical protein; K02955 small subunit ribosomal protein S14e
