# Supplementary material for: Comparative transcriptome analyses reveal genes related to pigmentation in the petals of a flower color variation cultivar of Rhododendron obtusum
Source: Research Square preprint supplement (doi:10.21203/rs.3.rs-263287/v1), 2021-03-03
Supplement: Supplementary file 4 [file 8b84a62db6027af84d278682.xlsx]

## Sheet: Sheet1
Table S2. The content of individual compound of anthocyanins at different floral development stages
No. of peaks	Retention Time (min)	λmax (nm)	[M]+	Fragment Ions	Tentative Identification	‘Yanzhi Mi’ (μg/g)					‘Dayuanyangjin’ (μg/g)
						S1	S2	S3	S4	S5	S1	S2	S3	S4	S5
1	14.63	278, 515	581	449419	cyanidin-3-glucoside-5-xyloside	5.14±0.16	563.79±71.24	409.85±26.21	164.89±22.96	246.17±26.88	11.29±0.08	0.14±0.02	0.11±0.01	0.12±0.011	2.32±0.04
2	14.63	280, 524	595	463433	peonidin-3-glucoside-5-xyloside	1.77±0.13	20.06±2.84	117.59±5.07	0	14.33±4.24	2.90±0.12	3.93±0.27	0.98±0.11	0.11	0.22±0.01
3	14.63	280522	625	463	peonidin 3,5-diglucoside	0.18±0.04	0	29.44±1.88	0.13±0.01	27.85±1.58	0.30±0.01	0.44±0.01	0.36±0.02	0.29±0.002	0.60±0.03
4	16.34	280520	595	433	cyanidin-3-rutinoside	26.43±0.85	39.58±2.18	188.51±4.31	600.86±85.9	393.57±362.18	144.36±0.42	17.66±1.54	10.17±1.81	1.32±0.26	14.58±0.051
5	17.56	280, 526	579	433	Pelargonidin-3-diphrhamnoside	337.18±29.95	892.57±84.22	22.82±2.1	14.06±0.79	16.94±0.62	305.92±19.91	33.67±0.56	21.43±2.2	42.17±0.35	20.59±0.53
6	17.56	284, 524	449	/	cyanidin-3-glucoside	2.05±0.3	138.24±13.85	65.32±1.22	24.16±2.7	113.13±9.24	2.04±0.18	0.04±0.001	0.01±0.001	0.04	0.11±0.02
7	19.06	280, 520	419	/	cyanidin-3-xyloside	2.21±0.04	361.15±39.83	289.82±15.88	94.75±8.96	139.9±16.4	18.07±0.01	0.05±0.01	0.08±0.002	0.52±0.01	1.71±0.04
