# Supplementary material for: Comparative transcriptome analyses reveal genes related to pigmentation in the petals of a flower color variation cultivar of Rhododendron obtusum
Source: Research Square preprint supplement (doi:10.21203/rs.3.rs-263287/v1), 2021-03-03
Supplement: Supplementary file 5 [file 8c8627d7c7fe3d35d964bdc6.xlsx]

## Sheet: Sheet1
Table S3. Output statistics of the total reads from 30 libraries
library	Total reads (n)	Total nucleotides (bp)	GC percentage	Q20 percentage	Q30 percentage
Y-S1-1	19222769	5766830700	46.51	96.66	91.34
Y-S1-2	22331328	6699398400	46.5	96.92	91.88
Y-S1-3	23632051	7089615300	46.46	97.27	92.65
Y-S2-1	26780361	8034108300	46.43	96.95	91.93
Y-S2-2	27405295	8221588500	46.53	97.16	92.35
Y-S2-3	28009677	8402903100	46.32	97.26	92.62
Y-S3-1	27014907	8104472100	46.37	97.24	92.55
Y-S3-2	24059837	7217951100	46.33	97.39	92.89
Y-S3-3	22112398	6633719400	46.16	97.02	92.08
Y-S4-1	24442009	7332602700	46.03	96.9	91.74
Y-S4-2	22215197	6664559100	46.16	96.94	91.86
Y-S4-3	24465793	7339737900	46.43	97.2	92.49
Y-S5-1	21185878	6355763400	45.71	96.25	90
Y-S5-2	20720472	6216141600	46.14	97.02	92.06
Y-S5-3	24422402	7326720600	46.01	97.14	92.3
D-S1-1	26028933	7808679900	46.57	97.43	92.96
D-S1-2	26915580	8074674000	46.73	97.14	92.39
D-S1-3	21660467	6498140100	46.79	97.44	93.08
D-S2-1	21966670	6590001000	46.73	97.47	93.09
D-S2-2	23823622	7147086600	46.61	97.21	92.51
D-S2-3	22758817	6827645100	46.66	97.33	92.79
D-S3-1	22395101	6718530300	46.44	97.25	92.6
D-S3-2	23255235	6976570500	46.43	97.44	93.02
D-S3-3	24889784	7466935200	46.45	97.42	92.96
D-S4-1	21005434	6301630200	46.55	97.29	92.69
D-S4-2	25745632	7723689600	46.69	97.37	92.88
D-S4-3	25356113	7606833900	46.66	97.22	92.52
D-S5-1	26206024	7861807200	46.43	97.41	92.88
D-S5-2	27213745	8164123500	46.3	97.19	92.45
D-S5-3	25079568	7523870400	46.47	97.46	93.04
Y represents ‘Yanzhi Mi’ and D represents ‘Dayuanyangjin’; S1, S2, S3, S4 and S5 represent closed buds, buds showing color at the top but with the scales still present, initial flowering stage, full flowering stage and last flowering stage, respectively.
