# Supplementary material for: Comparative transcriptome analyses reveal genes related to pigmentation in the petals of a flower color variation cultivar of Rhododendron obtusum
Source: Research Square preprint supplement (doi:10.21203/rs.3.rs-263287/v1), 2021-03-03
Supplement: Supplementary file 6 [file c35fbf4fd7737f9ae57ade70.xlsx]

## Sheet: Sheet1
Table S1. Selected genes and primers used in qRT-PCR analysis.
Unigene ID	Forward primer(5'-3')	Reverse primer (5'-3')
TRINITY_DN60820_c3_g1	AGTCATTGGAAAACGGGCAC	GTCGCACAACACTTCAGGTT
TRINITY_DN57417_c1_g1	GCGCGTGGAAAAGATGAAAA	TAGGACCGATCTGACGCTTT
TRINITY_DN67182_c3_g1	GTTGCTTCAGGACCAGGTTG	GATTCTGGAACGTGGCGATC
TRINITY_DN68439_c2_g2	GGTGCACACTGGGCTTTAAA	TGGCATGCACCTAGTAACGA
TRINITY_DN66271_c1_g3	AAGATCATCCTGAAGCCGCT	CCATGATCACCAGCCGATTG
TRINITY_DN51332_c0_g3	ATCAACGAGCTCAAGACCCA	CATCGGCTCCCACAATCTTG
TRINITY_DN67151_c2_g3	TGTTCAAGAGCACCAACAGC	TGGCATAATGAAGGGACCGA
TRINITY_DN59438_c0_g2	GCGAAAACGATAAAGCCCCT	TCTGAATCTGCTGCTGGTGA
TRINITY_DN48267_c5_g1	GGCAAAATGGTCATTTCATG	CTACTCATTTGCCGGATTTC
TRINITY_DN52302_c2_g1	GCGGCTAATTGCTCATTTAC	ATGGGGTTCTGGTAATATGC
ACTIN	CGGTGCCCTGAAATCCTGTT	AAACGCTCAGCCATTCCAGG
