# Supplementary material for: Comparative transcriptome analyses reveal genes related to pigmentation in the petals of a flower color variation cultivar of Rhododendron obtusum
Source: Research Square preprint supplement (doi:10.21203/rs.3.rs-263287/v1), 2021-03-03
Supplement: Supplementary file 7 [file 21c7f91cee591fdf83493a9f.xlsx]

## Sheet: Sheet1
Table S4. Statistics for the annotation results
#Anno_Database	Annotated_Number	300<=length<1000	length>=1000
NR_Annotation	77578	42661	34917
GO_Annotation	45902	22159	23743
KOG_Annotation	42496	21542	20954
COG_Annotation	28005	16424	11581
KEGG_Annotation	18018	9071	8947
Swissprot_Annotation	49672	23980	25692
Pfam_Annotation	44816	21683	23133
All_Annotated	79975	44655	35320
